# Supplementary material for: Non-conventional coordination of cavity-confined metal centres
Source: Royal Society of Chemistry journal article supplement (doi:10.1039/c2dt30751k), 2012-01-01
Supplement: c2dt30751k.pdf [file c2dt30751k.pdf]

## Electronic Supplementary Information

### Non-conventional coordination of cavity-confined metal centres

*Rafael Gramage-Doria,<sup>a</sup> Dominique Armspach,<sup>\*a</sup> Dominique Matt<sup>\*a</sup> and Loïc Toupet<sup>b</sup>*

---

<sup>a</sup>*Laboratoire de Chimie Inorganique et Catalyse, Université de Strasbourg, Institut de Chimie de Strasbourg, UMR 7177 CNRS, 1, rue Blaise-Pascal, 67008 Strasbourg cedex, France. E-mail : d.armspach@unistra.fr or dmatt@unistra.fr*

<sup>b</sup>*Groupe Matière Condensée et Matériaux, UMR 6626, Université de Rennes 1, Campus de Beaulieu, 35042, Rennes cedex, France*

† Electronic supplementary information (ESI) available: Experimental details and CIF file for the reported complex. CCDC reference number 801259.

## Content

- **Fig. SI-1.** Part of the  $^1\text{H}$  NMR spectra of **WIDEPHOS** (top), complex **10** (middle) and complex **11** (bottom) recorded in  $\text{CDCl}_3$  showing the methoxy signals.
- **Fig. SI-2.** Part of  $^1\text{H}$ - $^1\text{H}$  ROESY NMR spectrum of bridged dinuclear palladium(II) complex **11** recorded in  $\text{CDCl}_3$  at 400.1 MHz.
- **NMR spectra of complexes 1-3, 5-11**
- **General procedure for full assignment of the  $^1\text{H}$  NMR signals of the glucose units.**

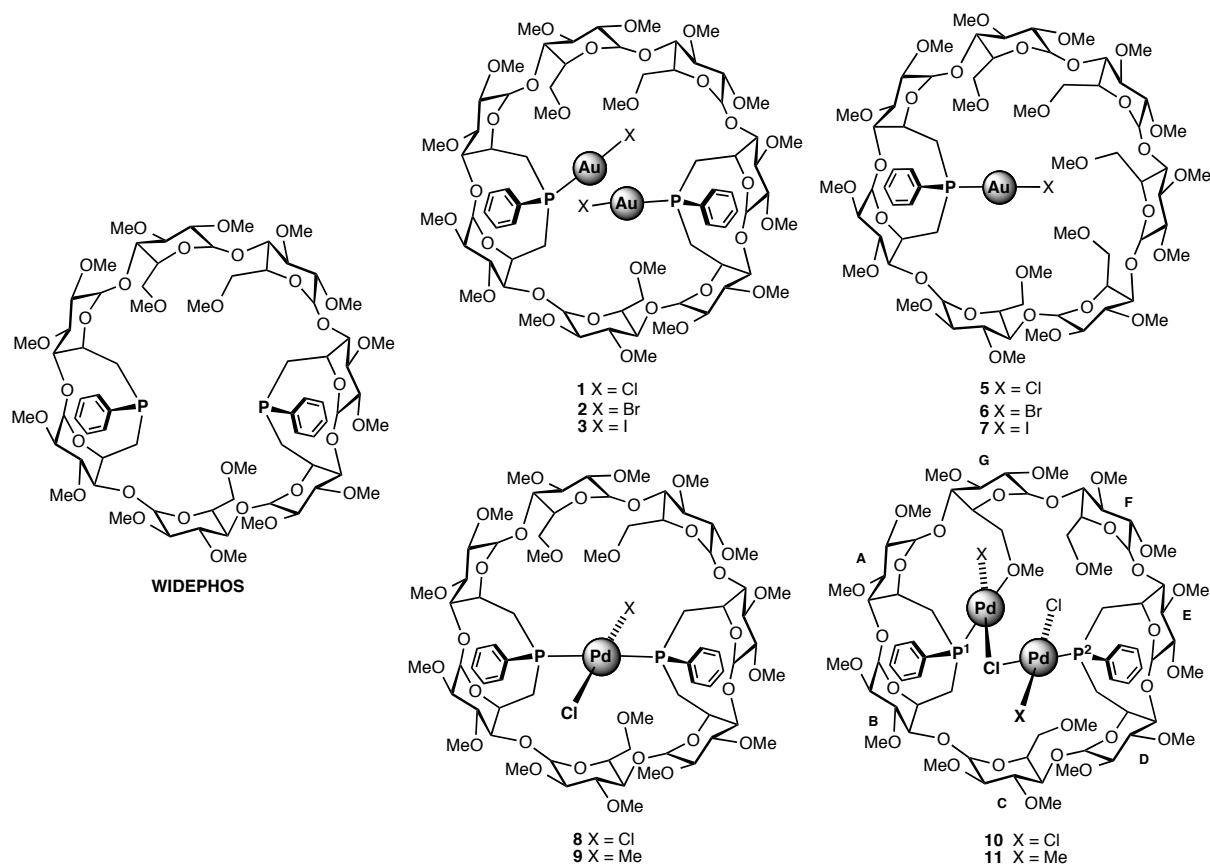

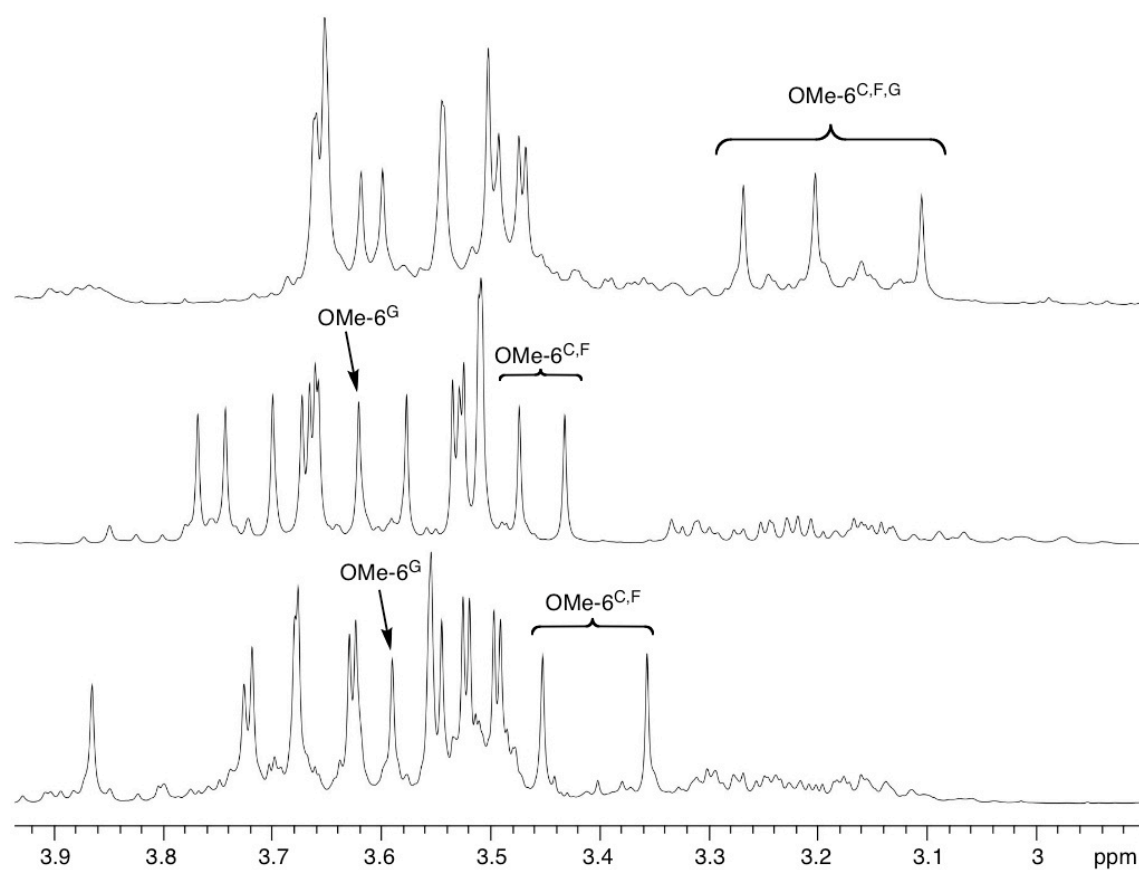

**Fig. SI-1.** Part of the  $^1\text{H}$  NMR spectra of **WIDEPHOS** (top), complex **10** (middle) and complex **11** (bottom) recorded in  $\text{CDCl}_3$  (298 K) showing the methoxy signals.

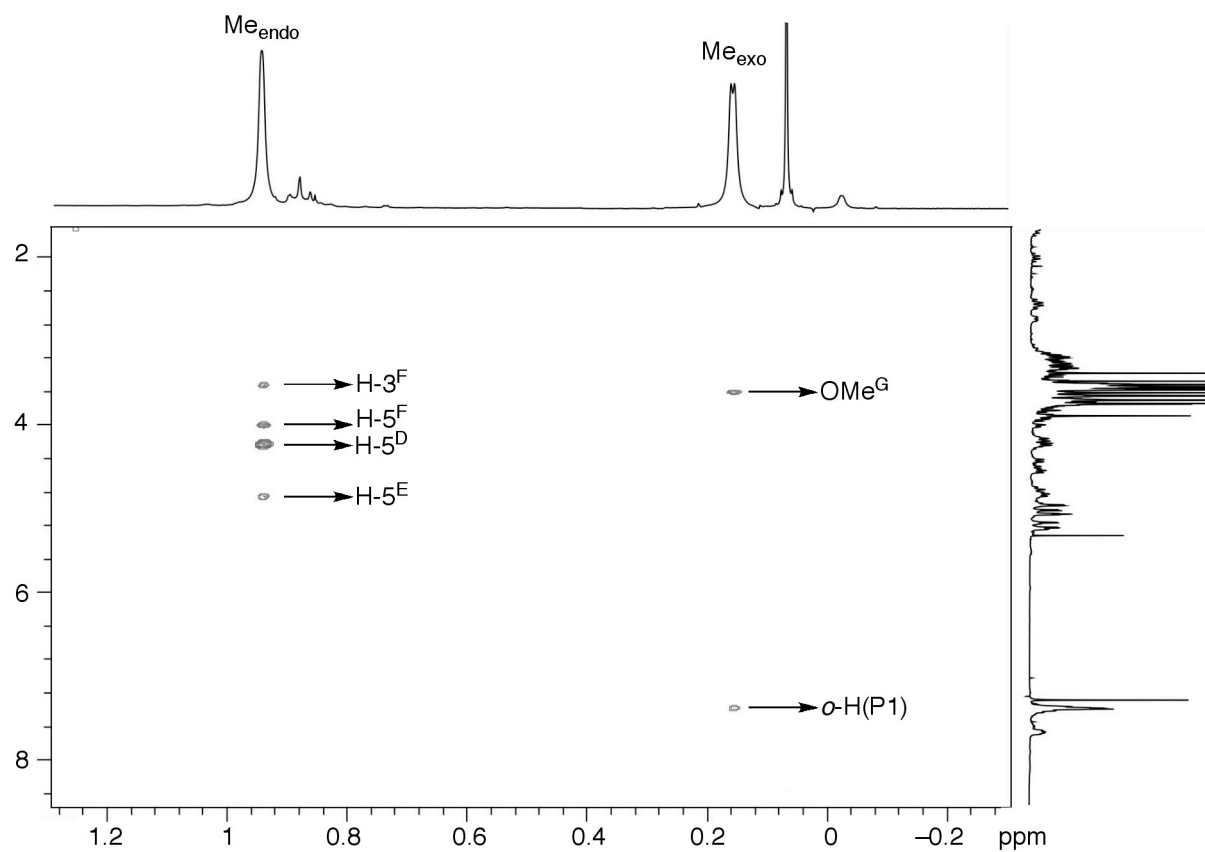

**Fig. SI-2.** Part of  $^1\text{H}$ - $^1\text{H}$  ROESY NMR spectrum of bridged dinuclear palladium(II) complex **11** recorded in  $\text{CDCl}_3$  at 400.1 MHz.



**NMR spectra of complexes 1-3, 5-11**

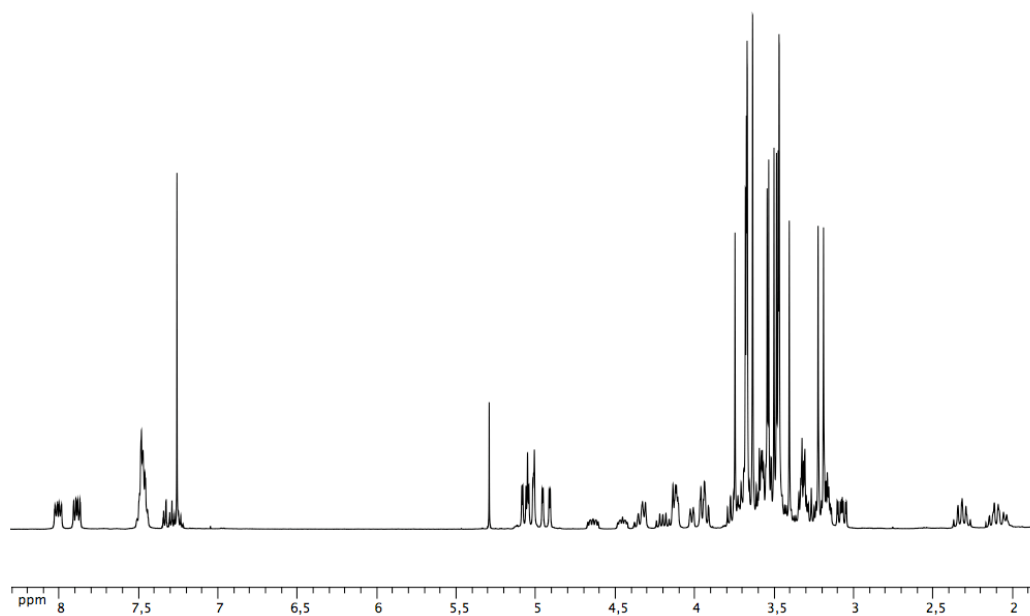

$^1\text{H}$  NMR spectrum of **1** recorded in  $\text{CDCl}_3$  at 500.1 MHz.

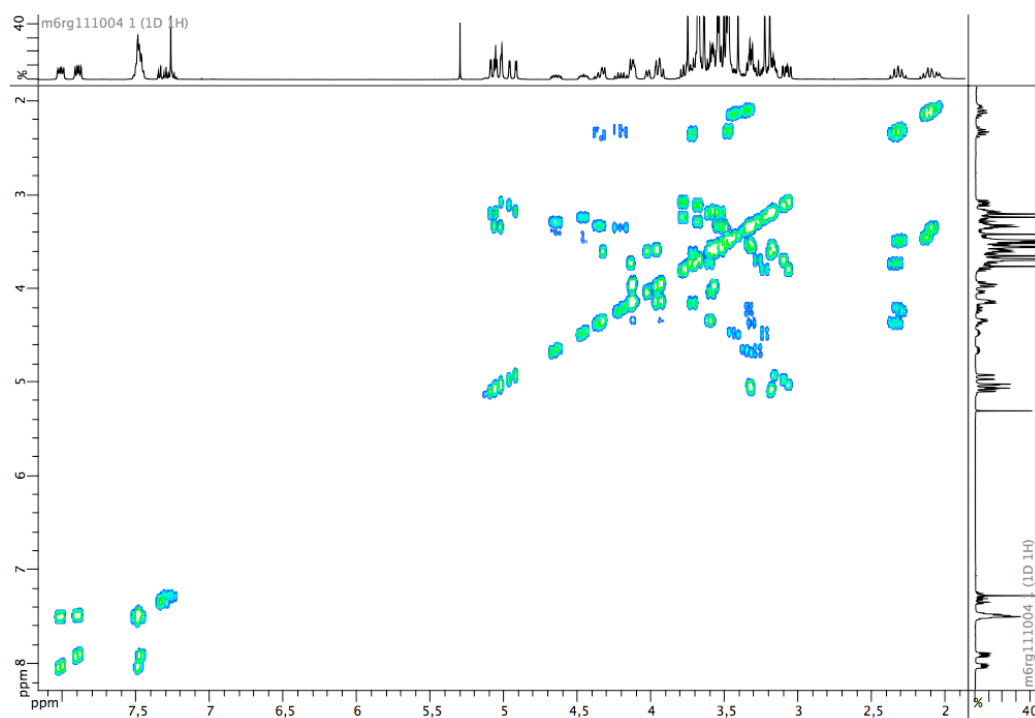

$^1\text{H}$ - $^1\text{H}$  COSY NMR spectrum of **1** recorded in  $\text{CDCl}_3$  at 500.1 MHz.

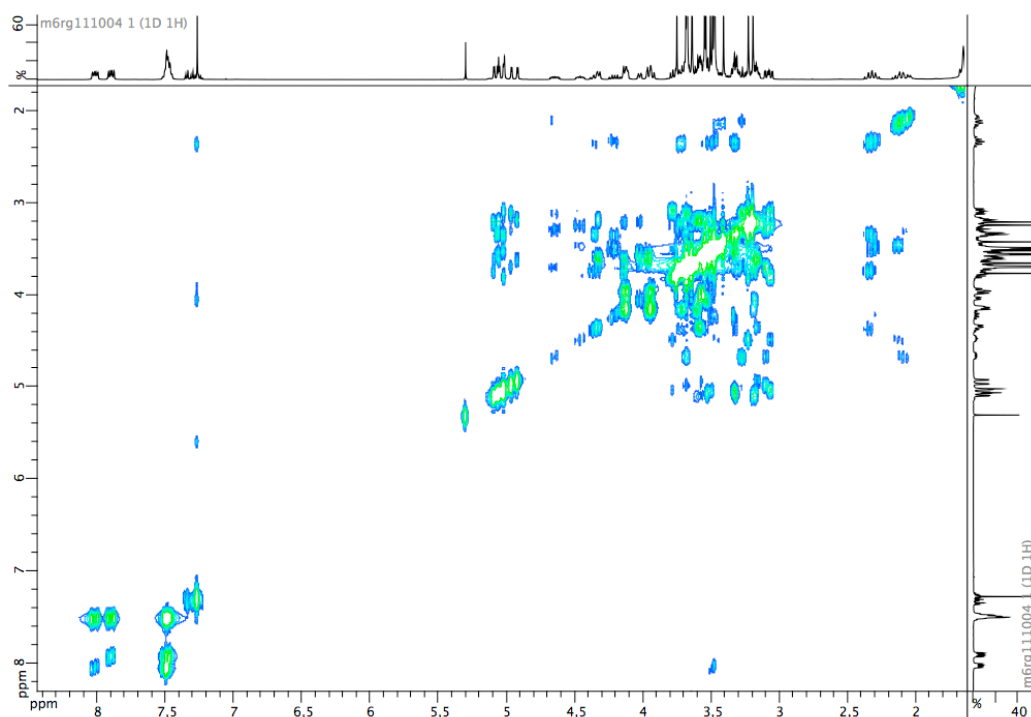

$^1\text{H}$ - $^1\text{H}$  TOCSY NMR spectrum of **1** recorded in  $\text{CDCl}_3$  at 500.1 MHz.

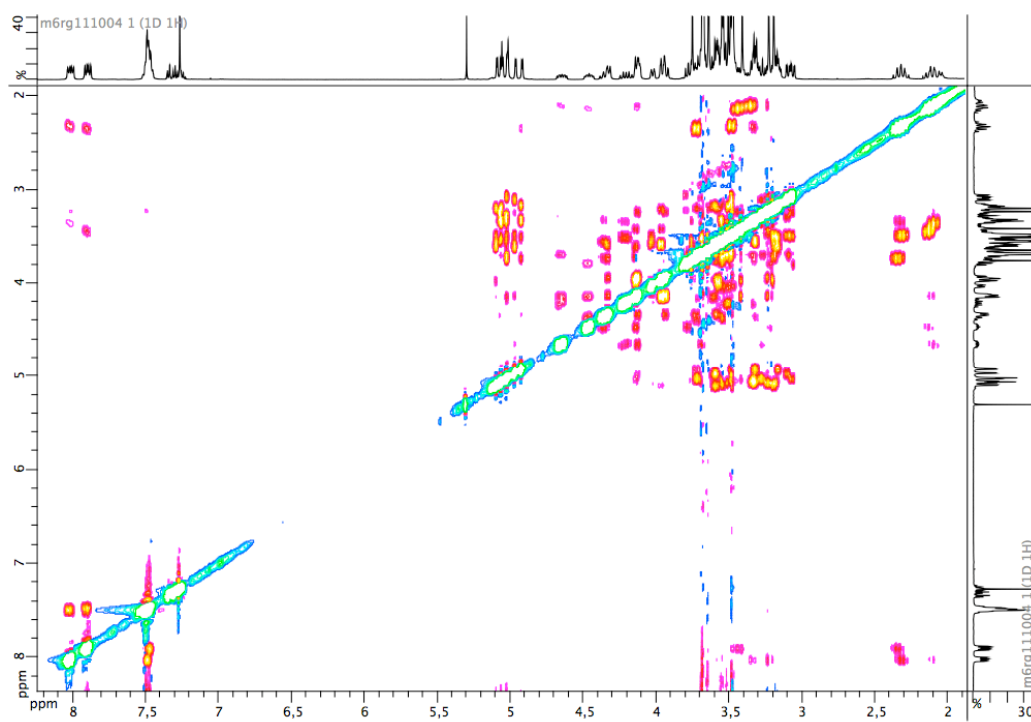

$^1\text{H}$ - $^1\text{H}$  ROESY NMR spectrum of **1** recorded in  $\text{CDCl}_3$  at 500.1 MHz.

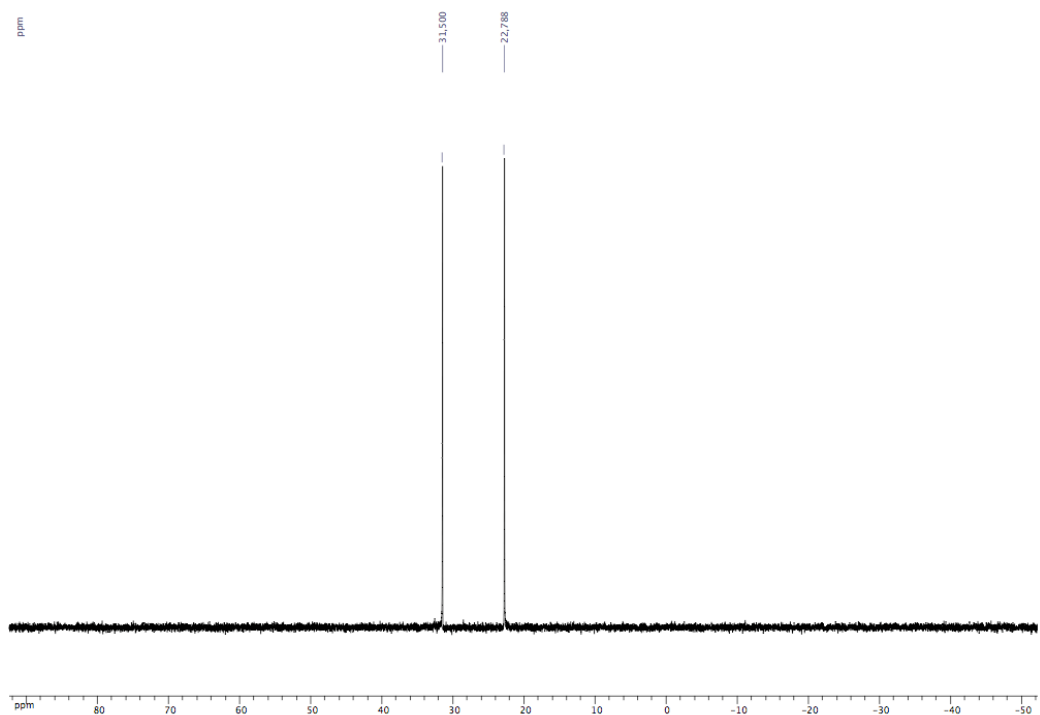

$^{31}\text{P}\{^1\text{H}\}$  NMR spectrum of **1** recorded in  $\text{CDCl}_3$  at 121.5 MHz.

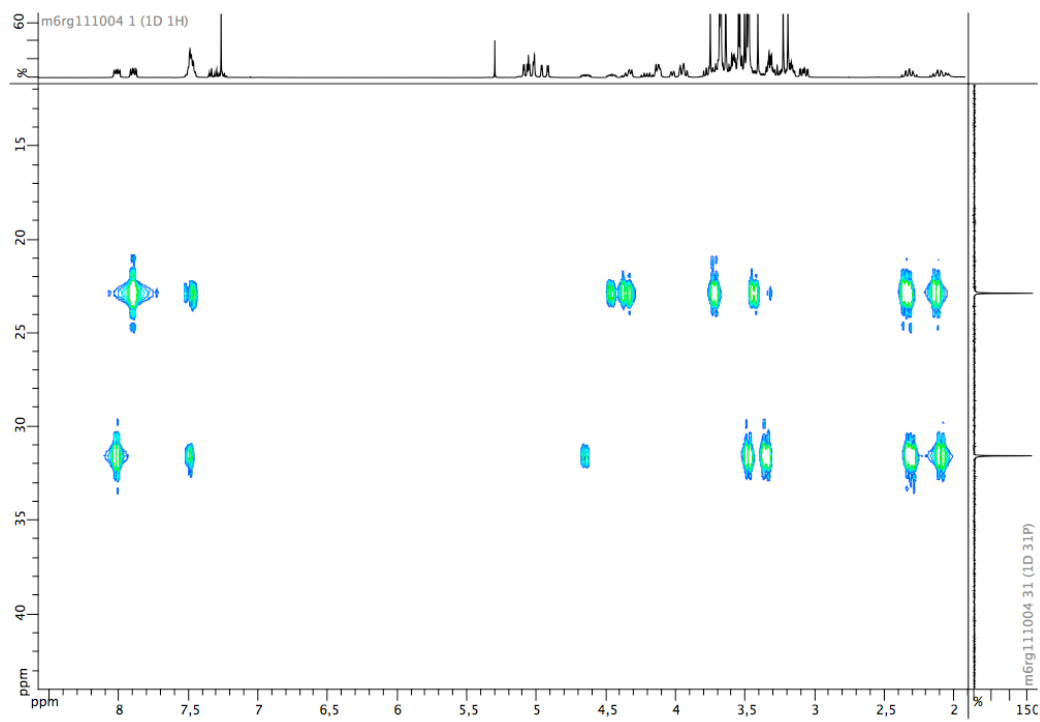

$^1\text{H}$ - $^{31}\text{P}\{^1\text{H}\}$  NMR spectrum of **1** recorded in  $\text{CDCl}_3$  at 500.1 MHz.

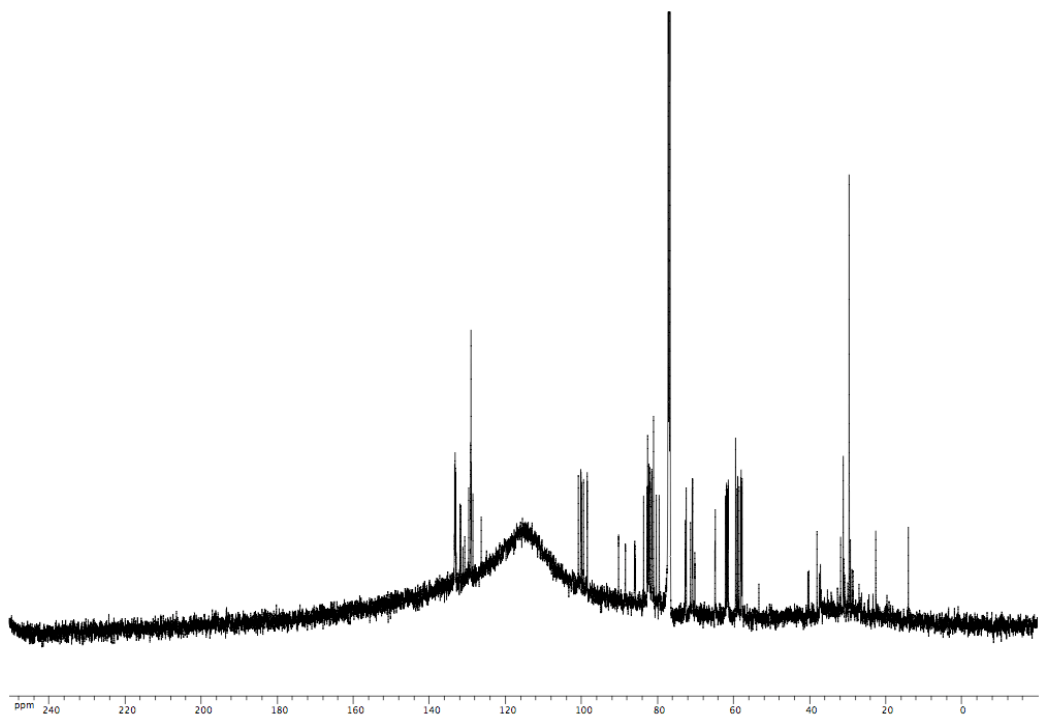

$^{13}\text{C}\{^1\text{H}\}$  NMR spectrum of **1** recorded in  $\text{CDCl}_3$  at 125.8 MHz.

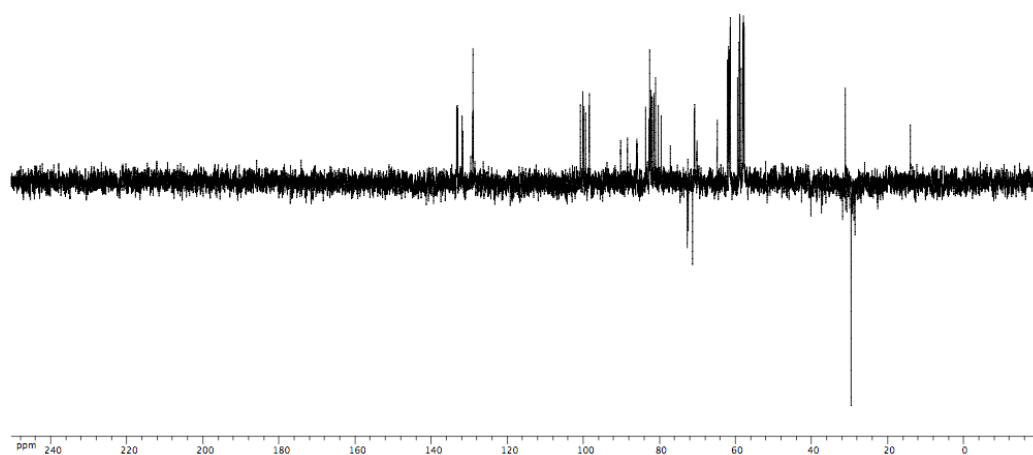

DEPT135 spectrum of **1** recorded in CDCl<sub>3</sub> at 125.8 MHz.



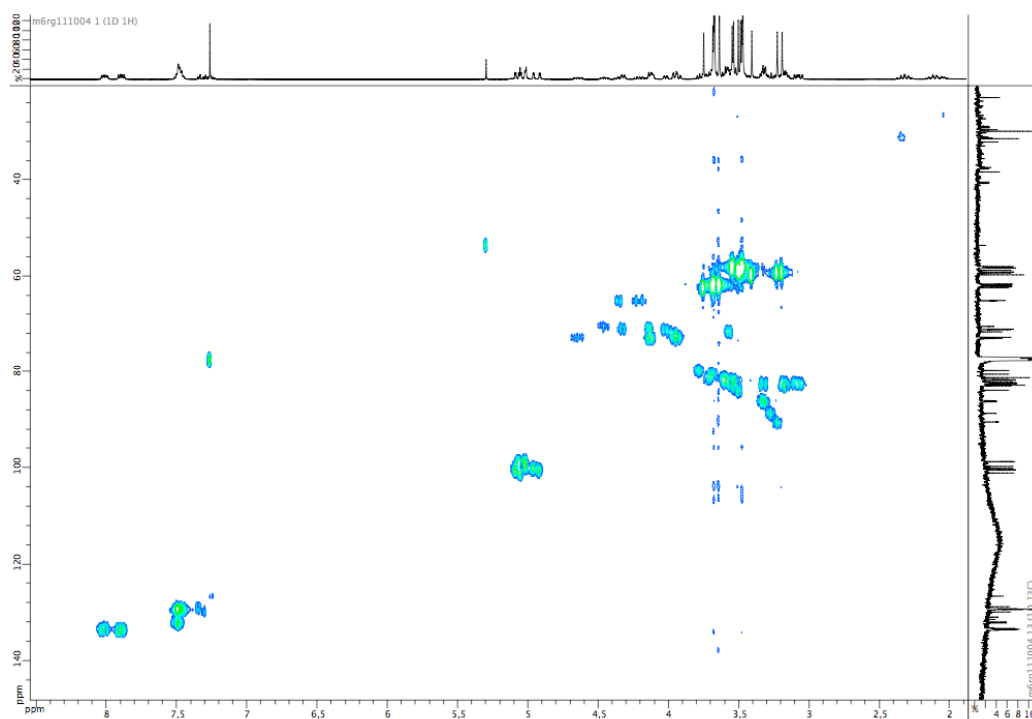

$^1\text{H}$ - $^{13}\text{C}\{^1\text{H}\}$  HMQC spectrum of **1** recorded in  $\text{CDCl}_3$  at 500.1 MHz.

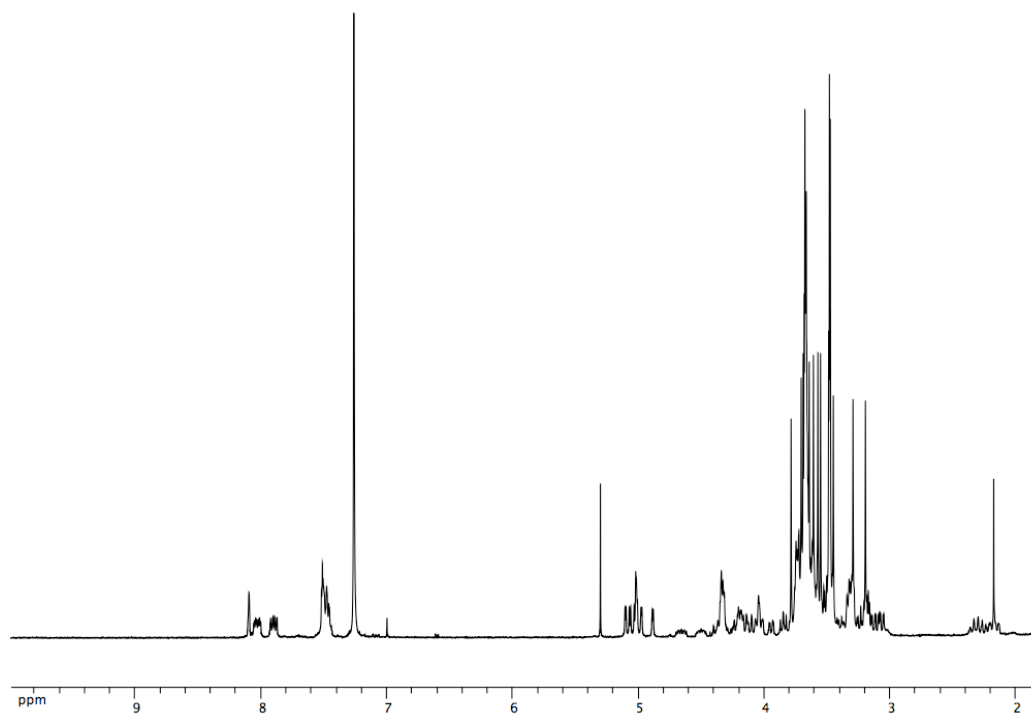

$^1\text{H}$  NMR spectrum of **2** recorded in  $\text{CDCl}_3$  at 400.1 MHz.

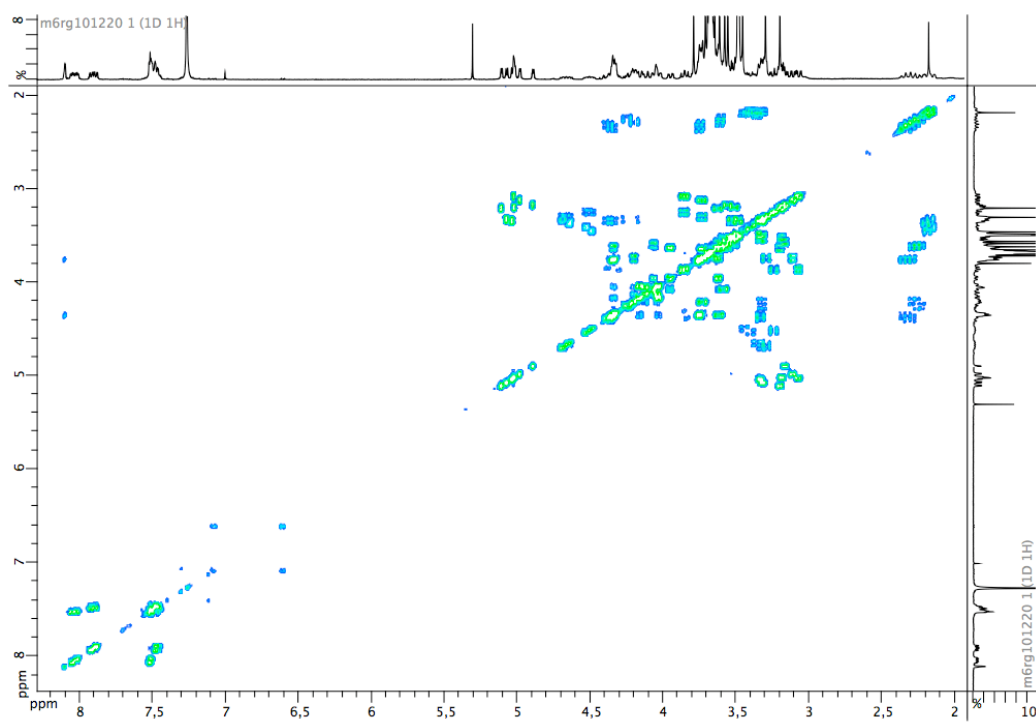

$^1\text{H}$ - $^1\text{H}$  COSY NMR spectrum of **2** recorded in  $\text{CDCl}_3$  at 400.1 MHz.

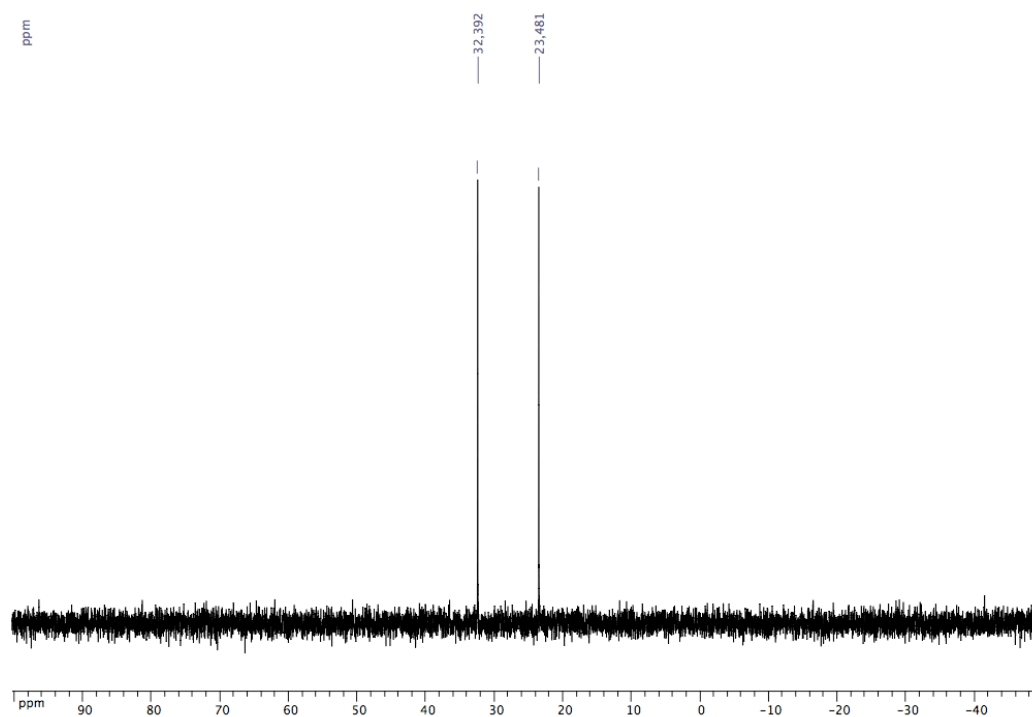

$^{31}\text{P}\{^1\text{H}\}$  NMR spectrum of **2** recorded in  $\text{CDCl}_3$  at 121.5 MHz.

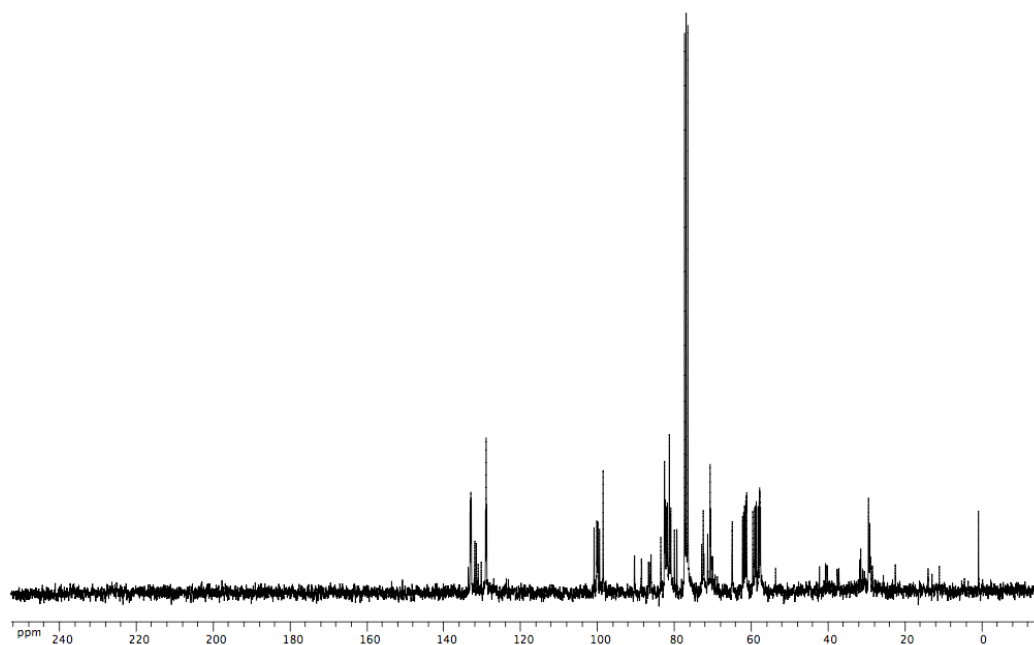

$^{13}\text{C}\{^1\text{H}\}$  NMR spectrum of **2** recorded in  $\text{CDCl}_3$  at 75.5 MHz.

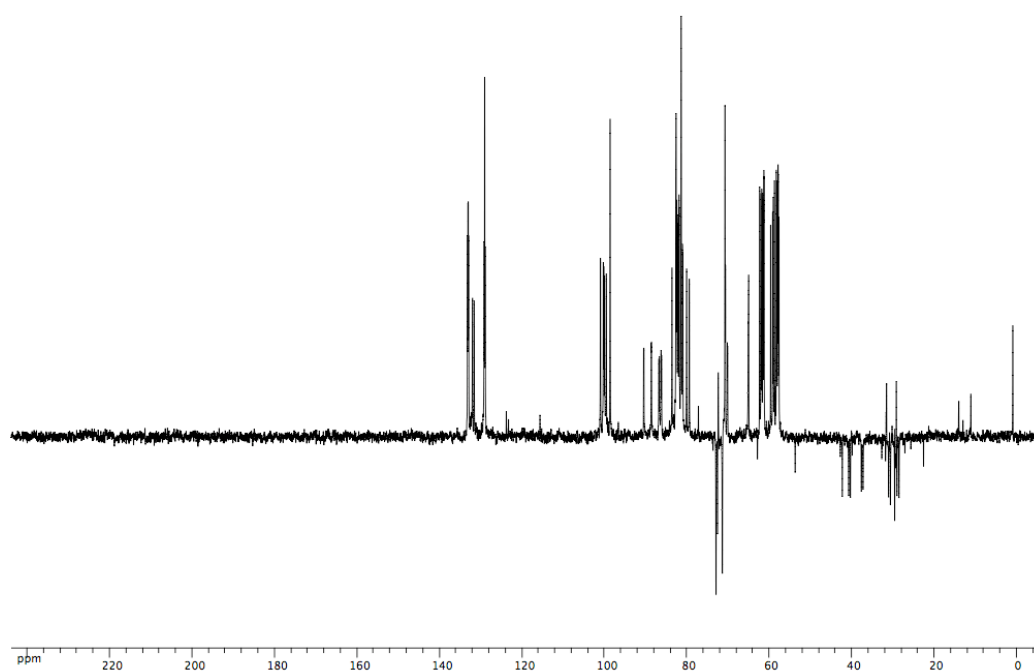

DEPT135 spectrum of **2** recorded in CDCl<sub>3</sub> at 75.5 MHz.

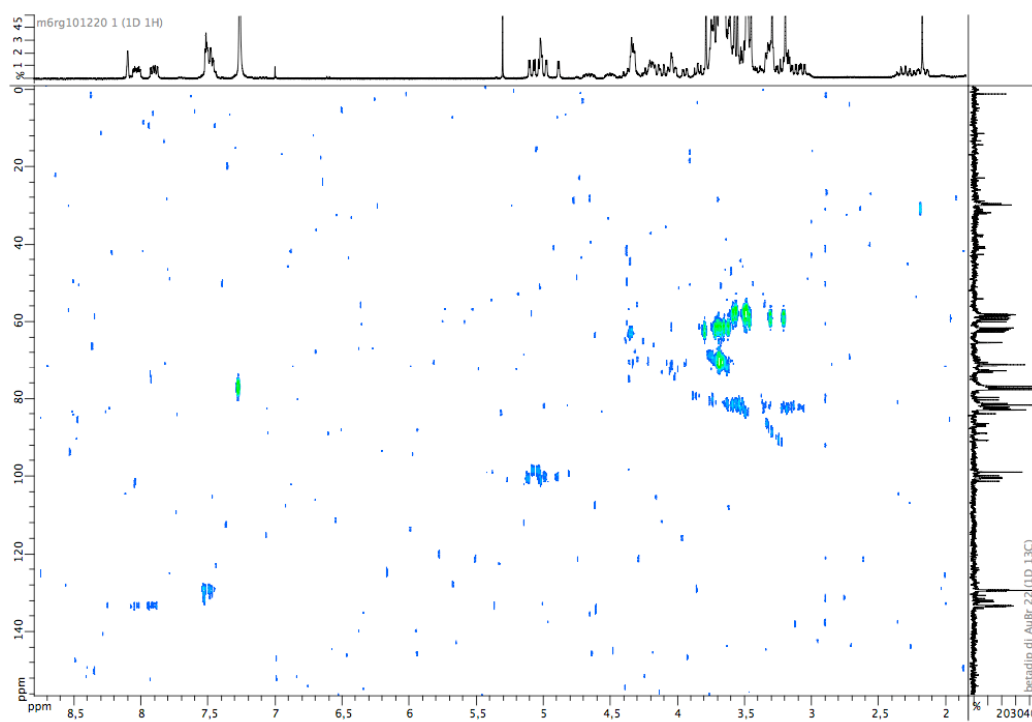

$^1\text{H}$ - $^{13}\text{C}\{^1\text{H}\}$  HMQC spectrum of **2** recorded in  $\text{CDCl}_3$  at 400.1 MHz.

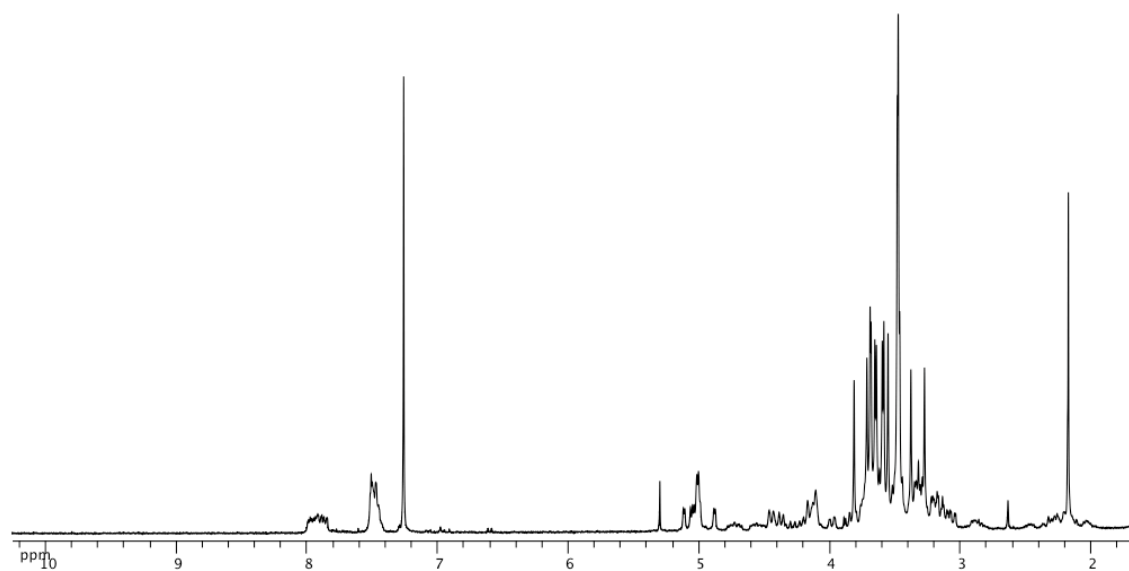

$^1\text{H}$  NMR spectrum of **3** recorded in  $\text{CDCl}_3$  at 300.1 MHz.



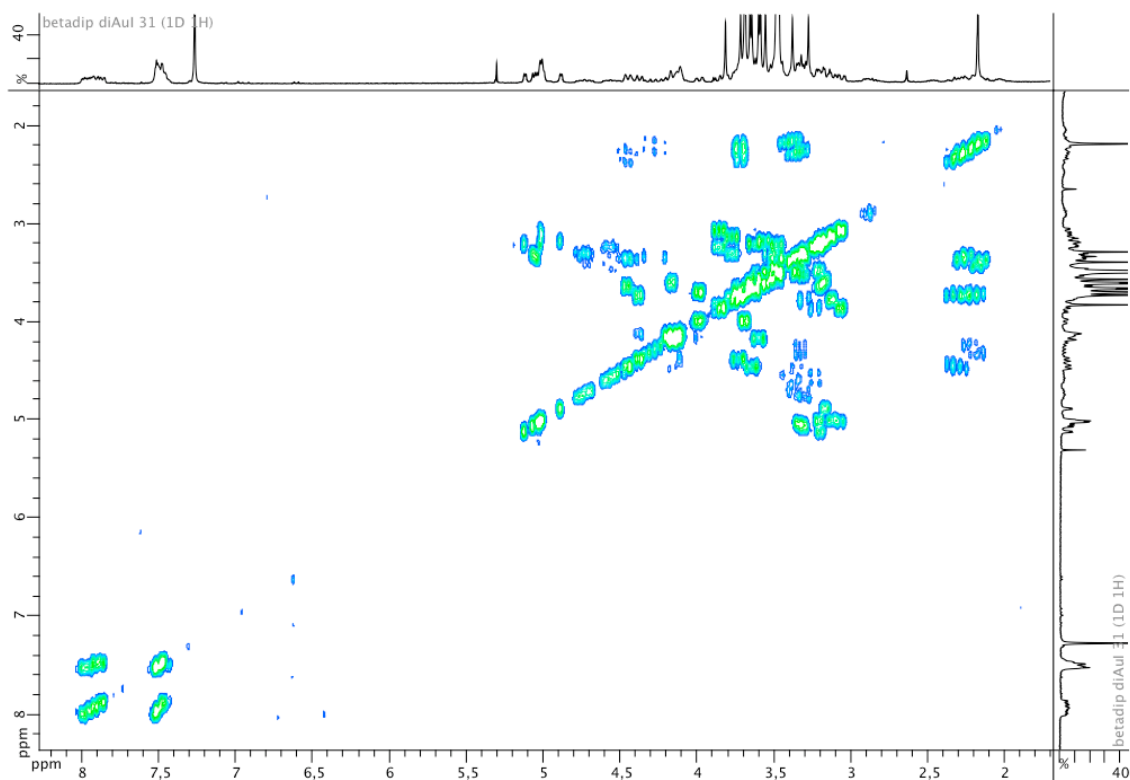

$^1\text{H}$ - $^1\text{H}$  COSY NMR spectrum of **3** recorded in  $\text{CDCl}_3$  at 300.1 MHz.

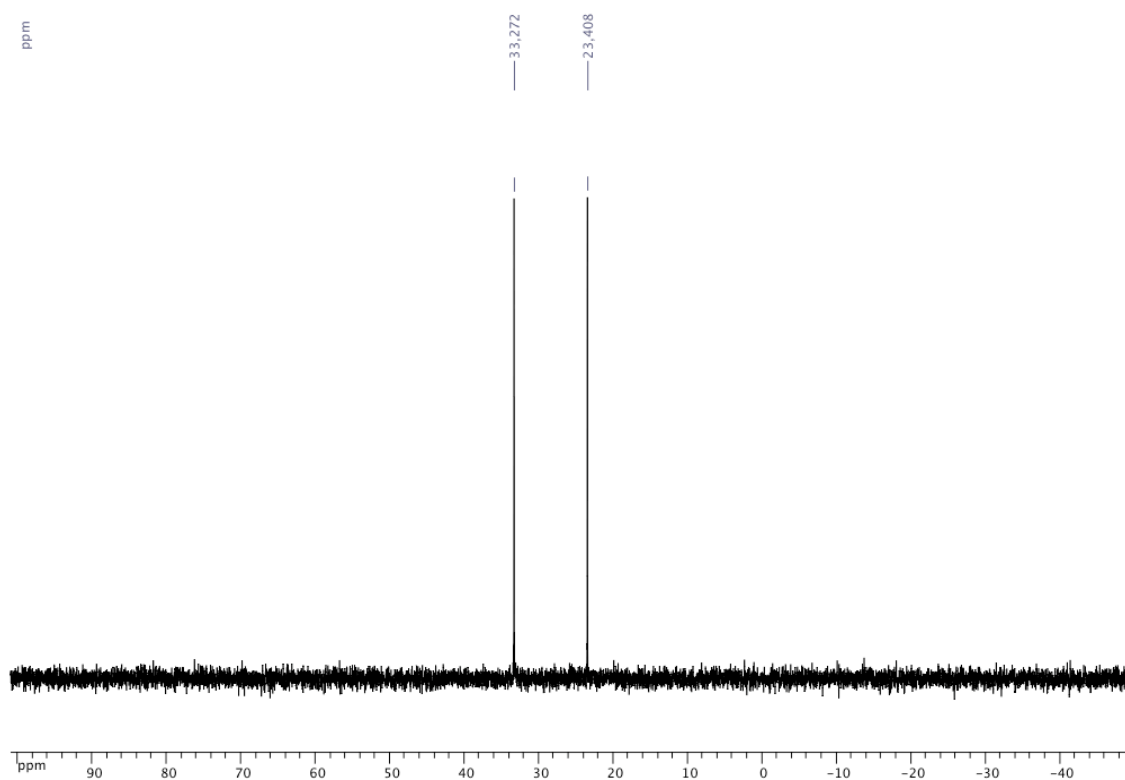

$^{31}\text{P}\{^1\text{H}\}$  NMR spectrum of **3** recorded in  $\text{CDCl}_3$  at 121.5 MHz.

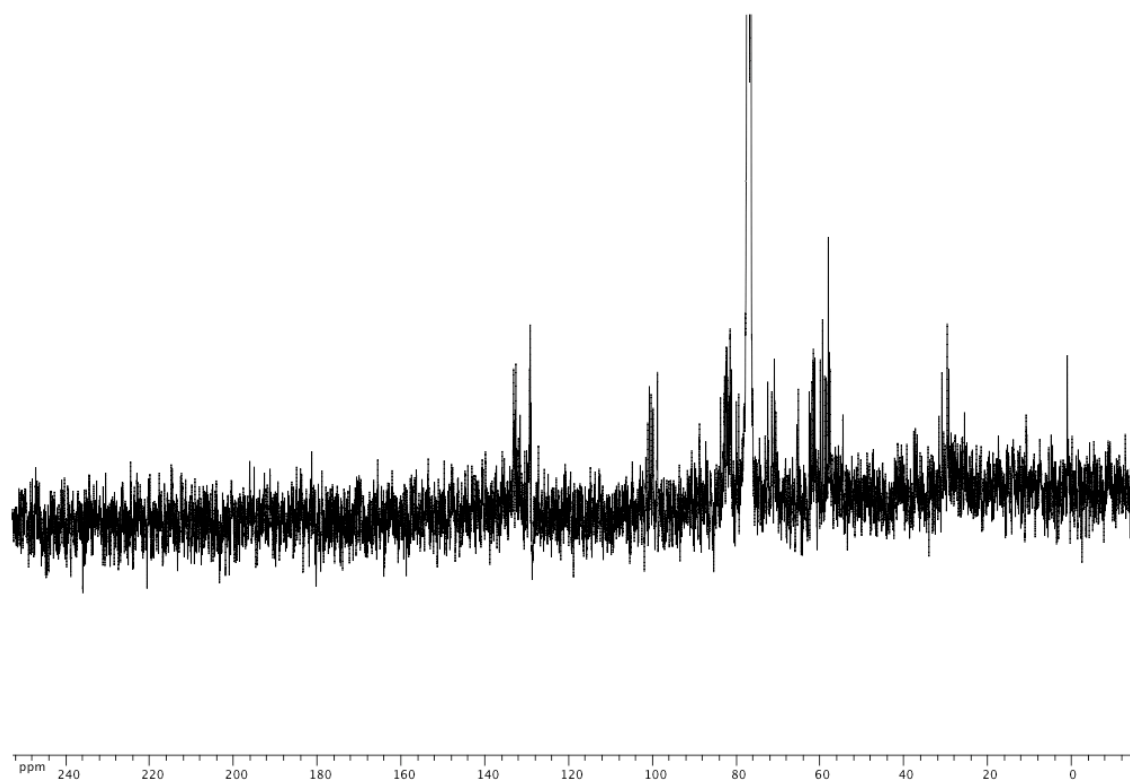

$^{13}\text{C}\{^1\text{H}\}$  NMR spectrum of **3** recorded in  $\text{CDCl}_3$  at 75.5 MHz.

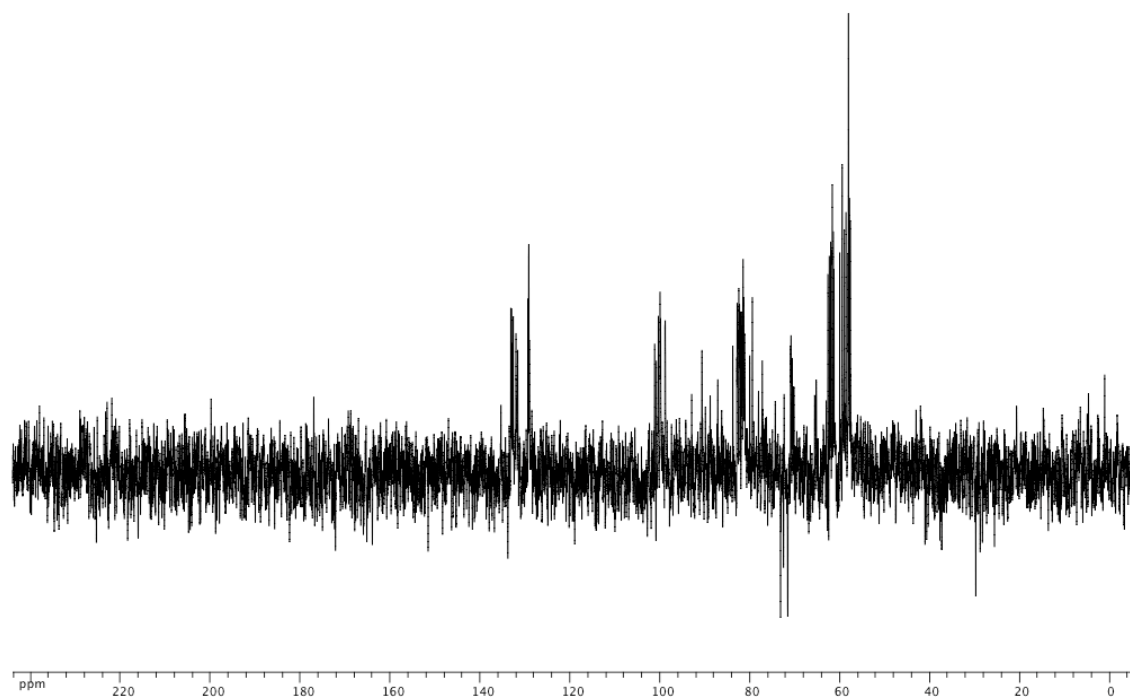

DEPT135 spectrum of **3** recorded in CDCl<sub>3</sub> at 75.5 MHz.

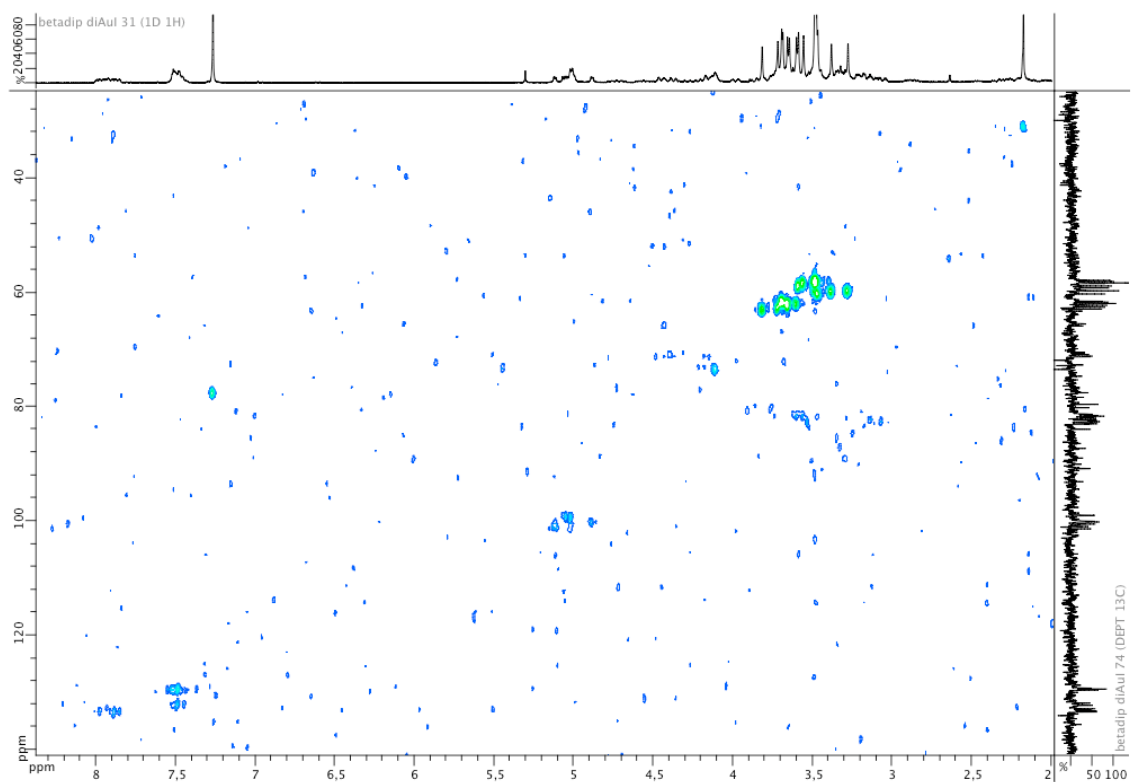

$^1\text{H}$ - $^{13}\text{C}\{^1\text{H}\}$  HMQC spectrum of **3** recorded in  $\text{CDCl}_3$  at 300.1 MHz.

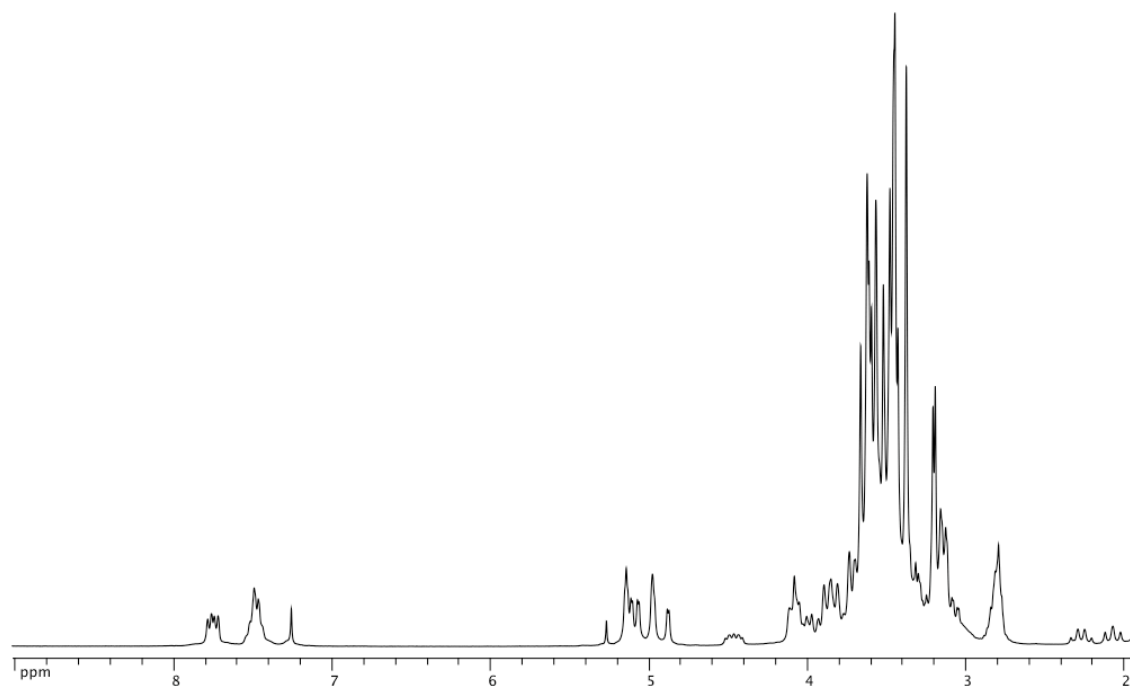

$^1\text{H}$  NMR spectrum of **5** recorded in  $\text{CDCl}_3$  at 300.1 MHz.

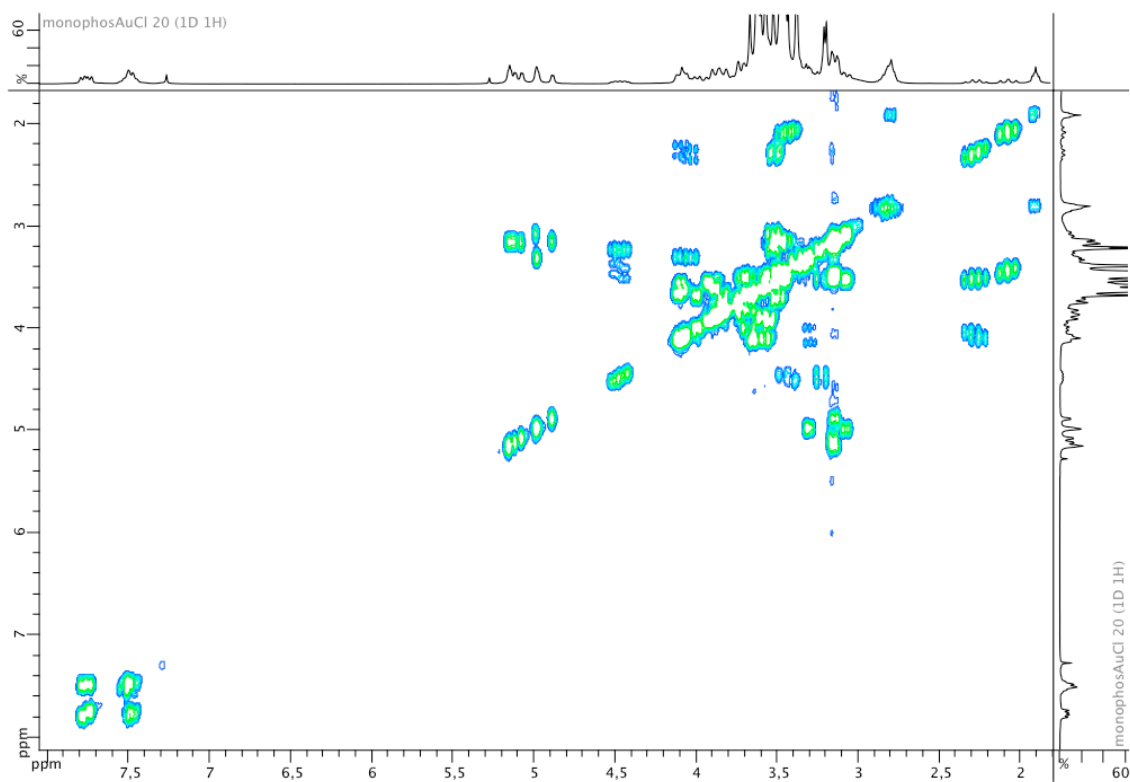

$^1\text{H}$ - $^1\text{H}$  COSY NMR spectrum of **5** recorded in  $\text{CDCl}_3$  at 300.1 MHz.

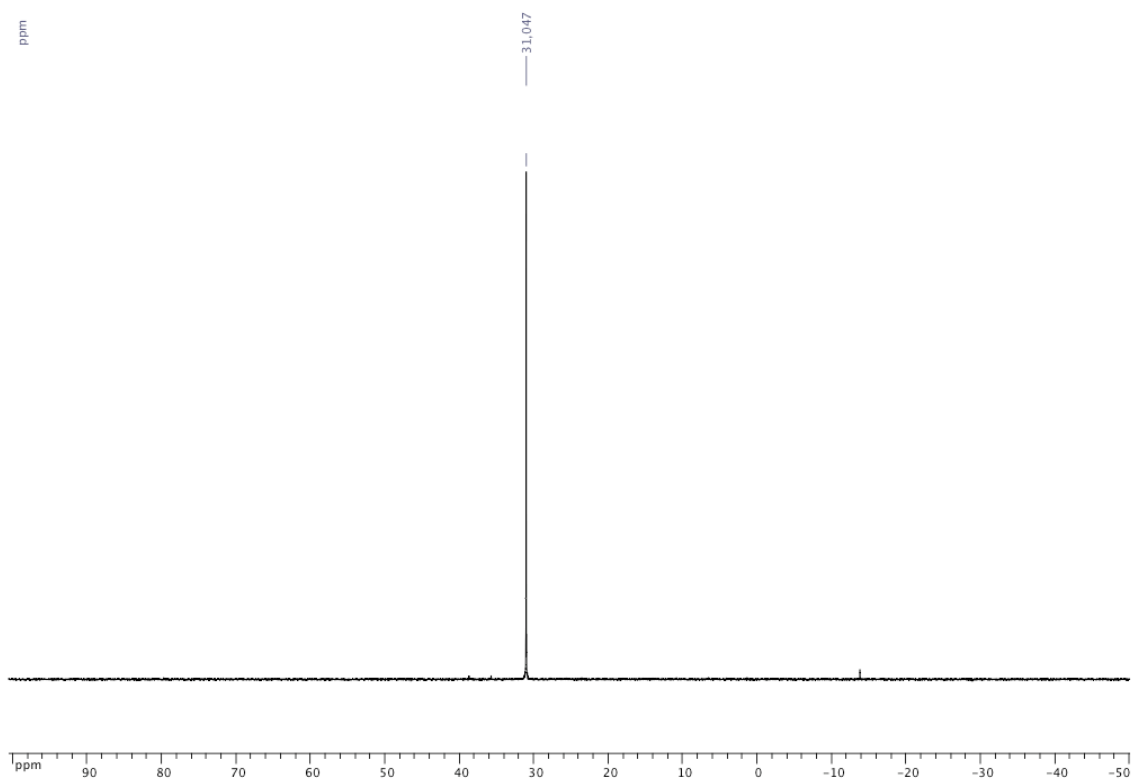

$^{31}\text{P}\{^1\text{H}\}$  NMR spectrum of **5** recorded in  $\text{CDCl}_3$  at 121.5 MHz.



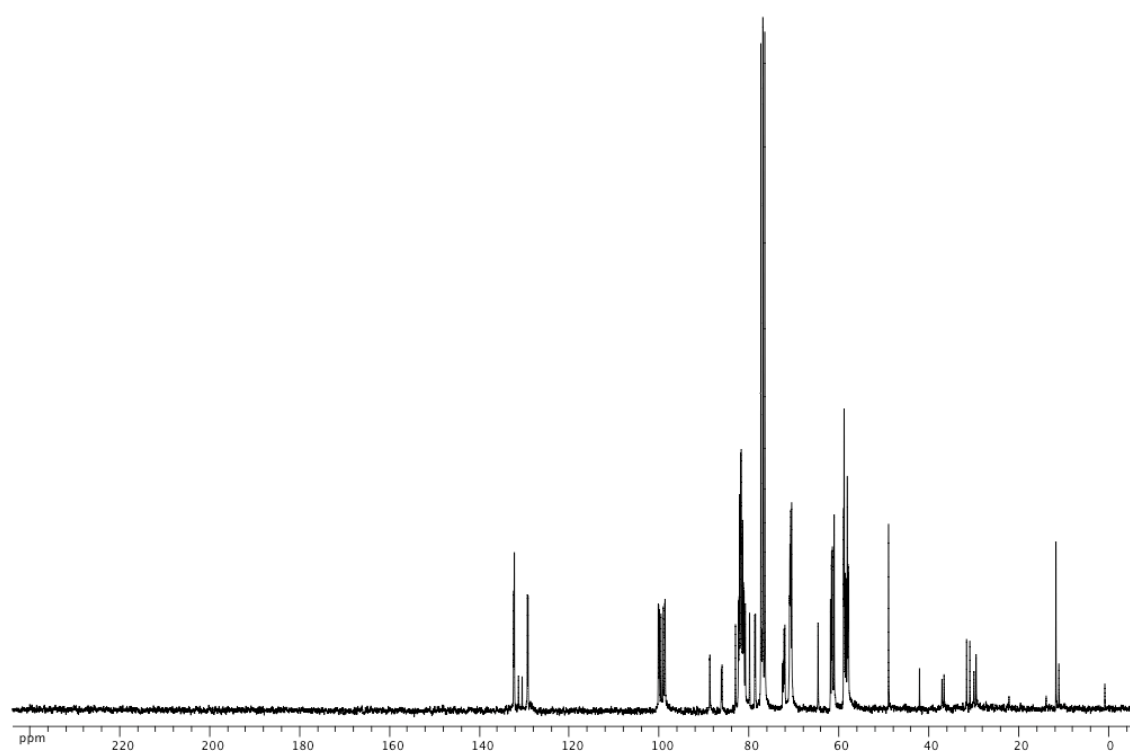

$^{13}\text{C}\{^1\text{H}\}$  NMR spectrum of **5** recorded in  $\text{CDCl}_3$  at 75.5 MHz.

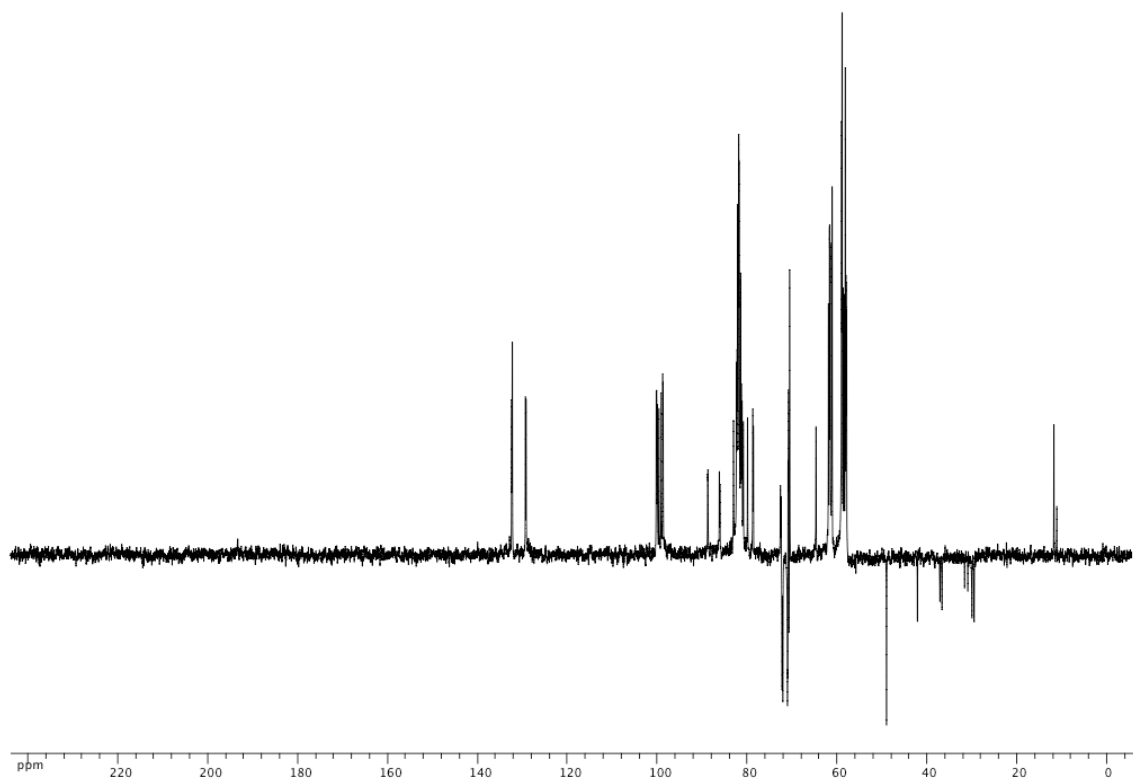

DEPT135 spectrum of **5** recorded in CDCl<sub>3</sub> at 75.5 MHz.

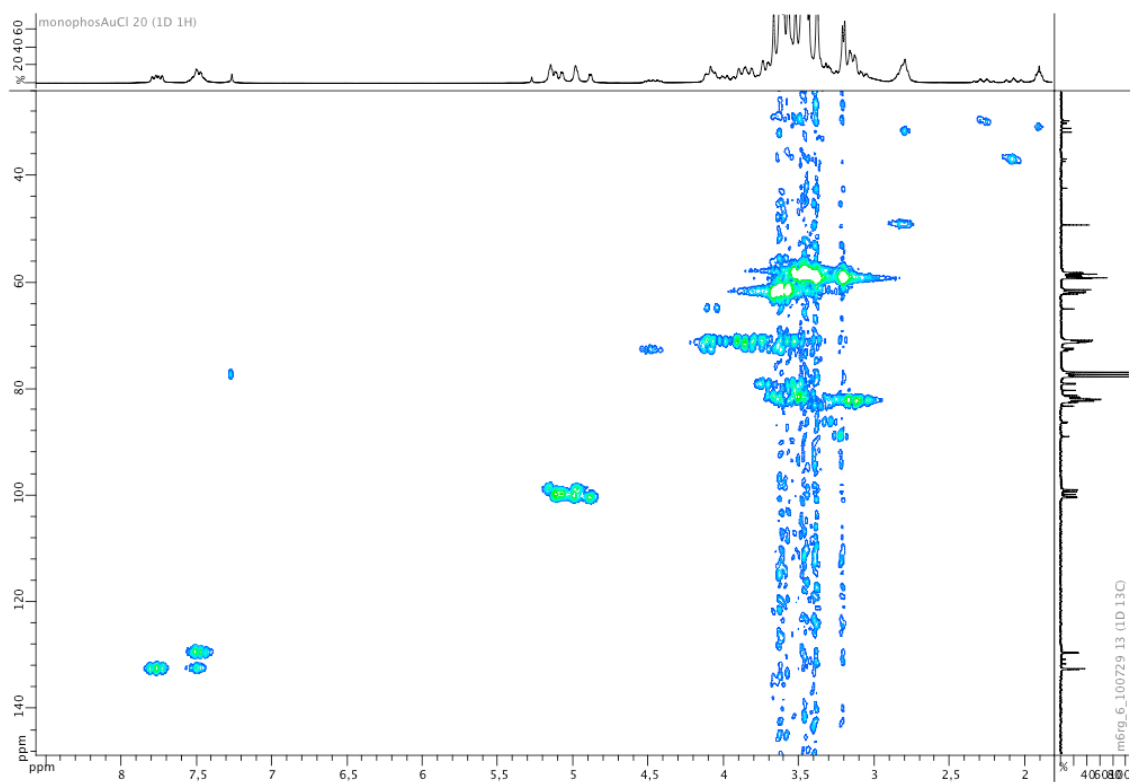

$^1\text{H}$ - $^{13}\text{C}\{^1\text{H}\}$  HMQC spectrum of **5** recorded in  $\text{CDCl}_3$  at 300.1 MHz.

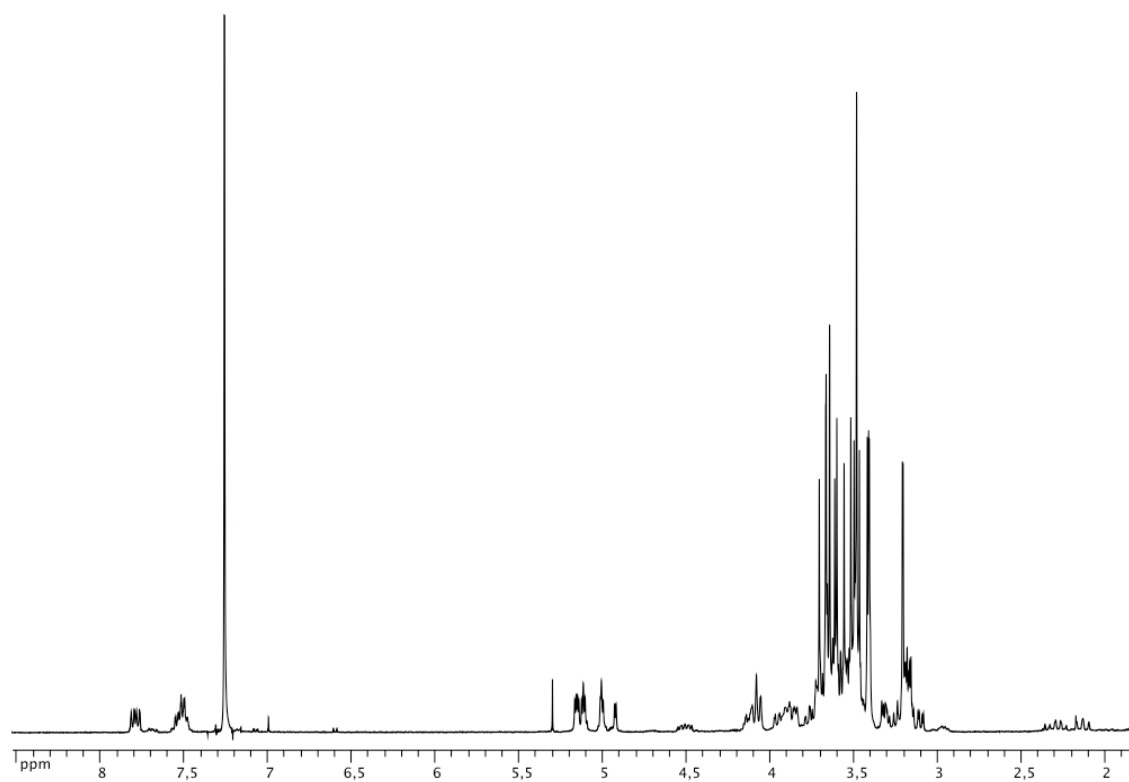

$^1\text{H}$  NMR spectrum of **6** recorded in  $\text{CDCl}_3$  at 400.1 MHz.

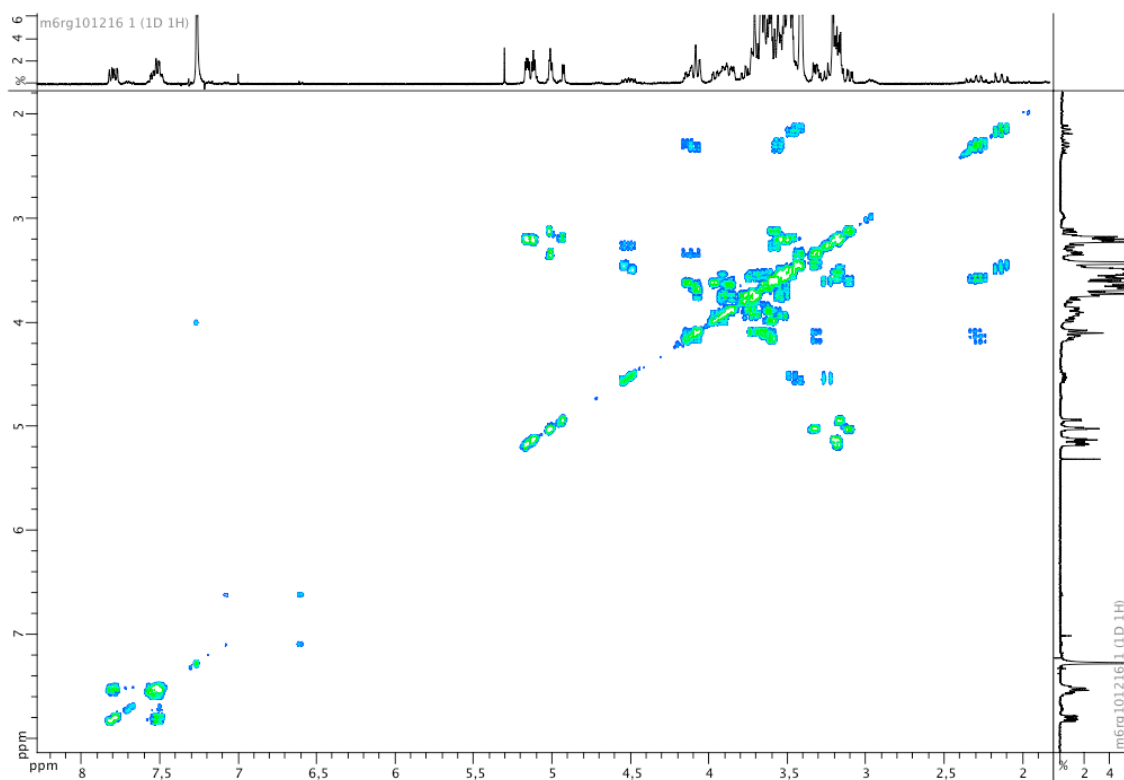

$^1\text{H}$ - $^1\text{H}$  COSY NMR spectrum of **6** recorded in  $\text{CDCl}_3$  at 400.1 MHz.

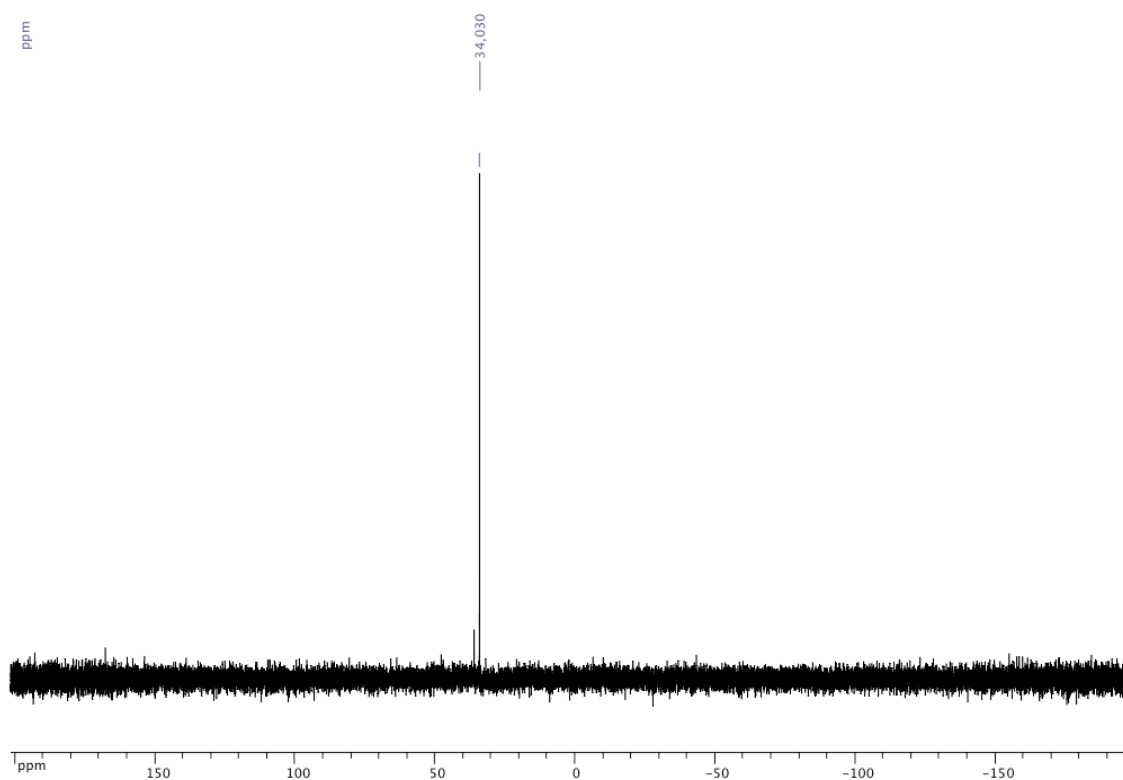

$^{31}\text{P}\{^1\text{H}\}$  NMR spectrum of **6** recorded in  $\text{CDCl}_3$  at 121.5 MHz.

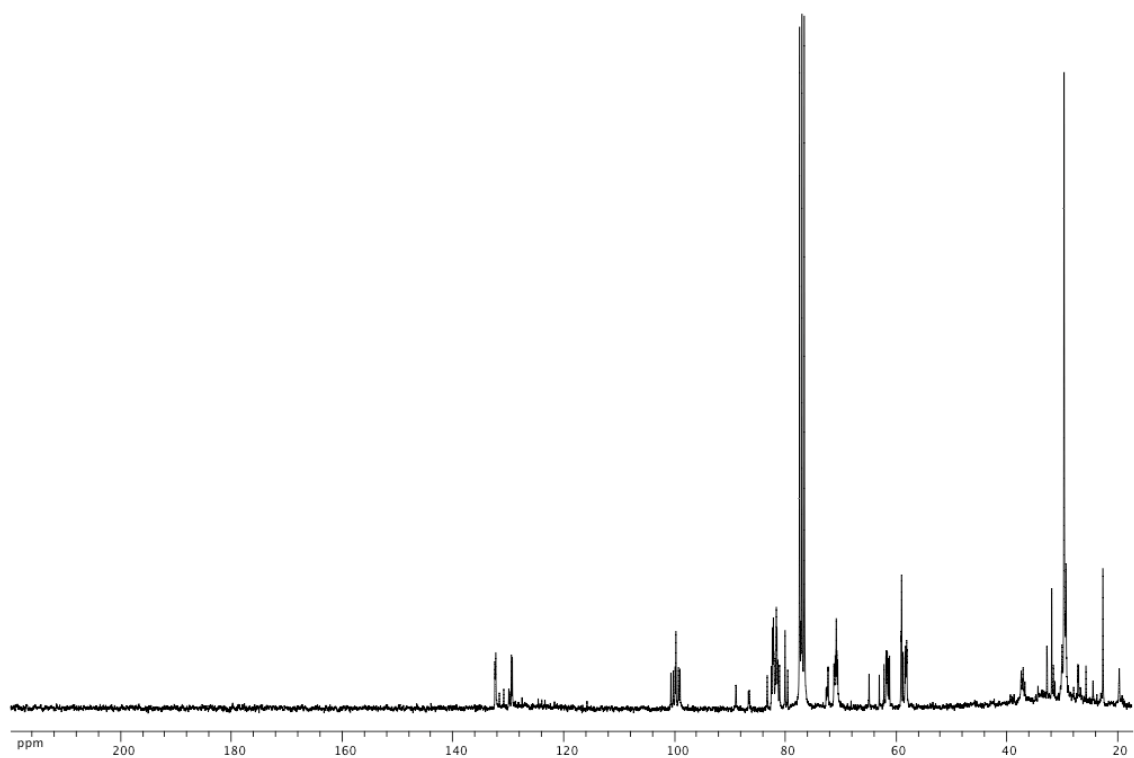

$^{13}\text{C}\{^1\text{H}\}$  NMR spectrum of **6** recorded in  $\text{CDCl}_3$  at 75.5 MHz.

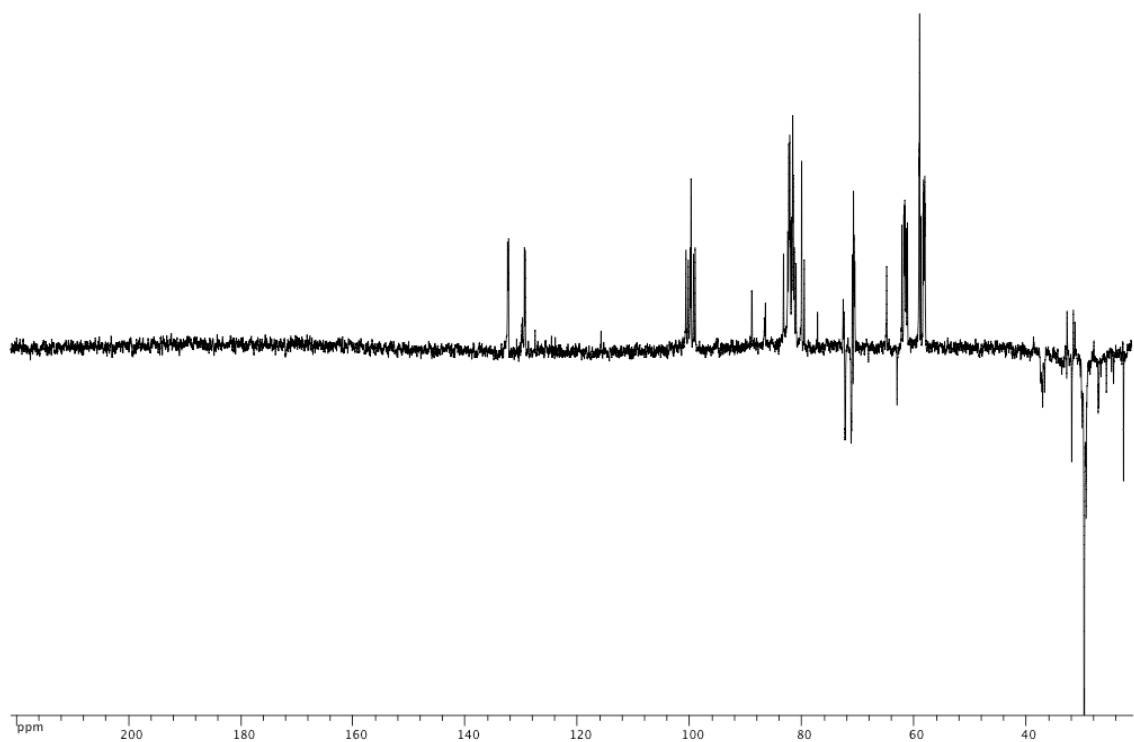

DEPT135 spectrum of **6** recorded in CDCl<sub>3</sub> at 75.5 MHz.



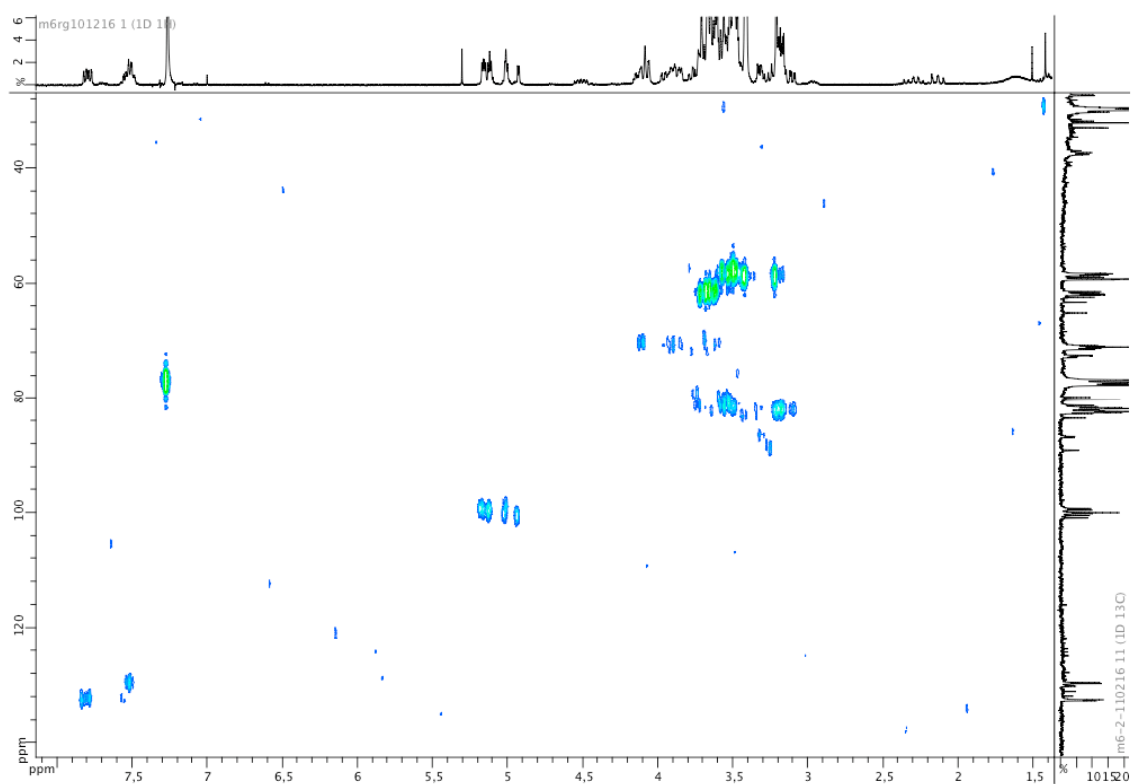

$^1\text{H}$ - $^{13}\text{C}\{^1\text{H}\}$  HMQC spectrum of **6** recorded in  $\text{CDCl}_3$  at 400.1 MHz.

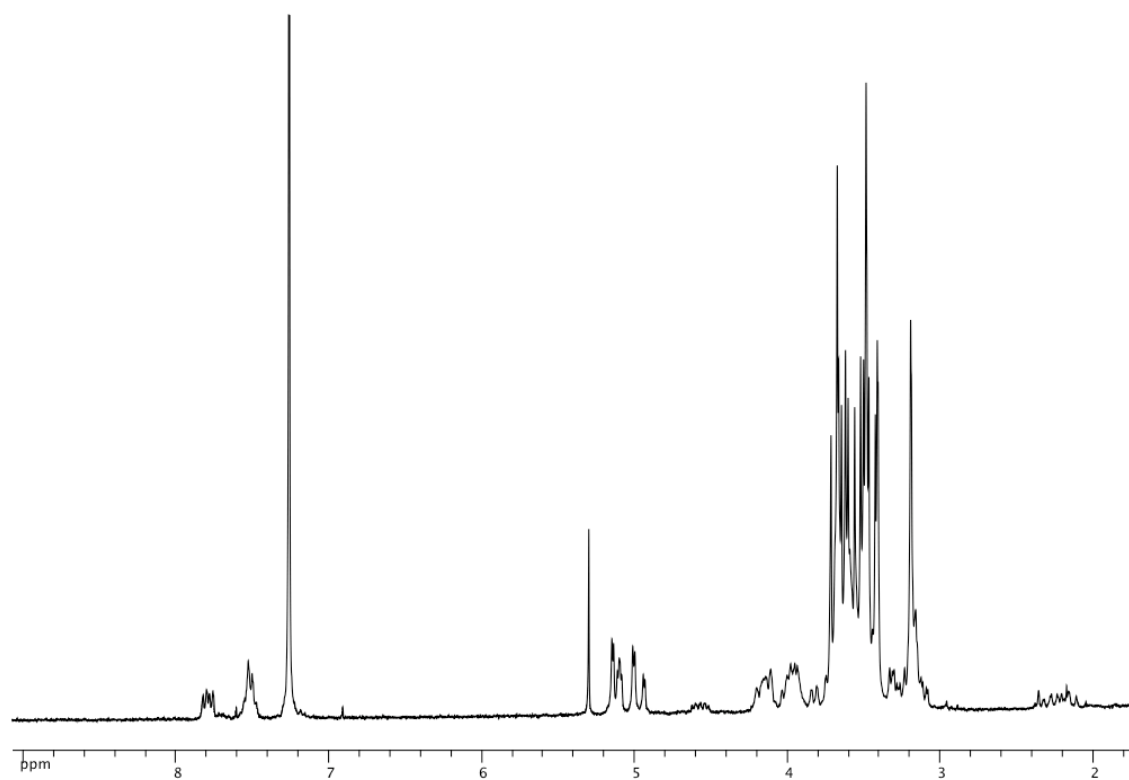

$^1\text{H}$  NMR spectrum of **7** recorded in  $\text{CDCl}_3$  at 300.1 MHz.

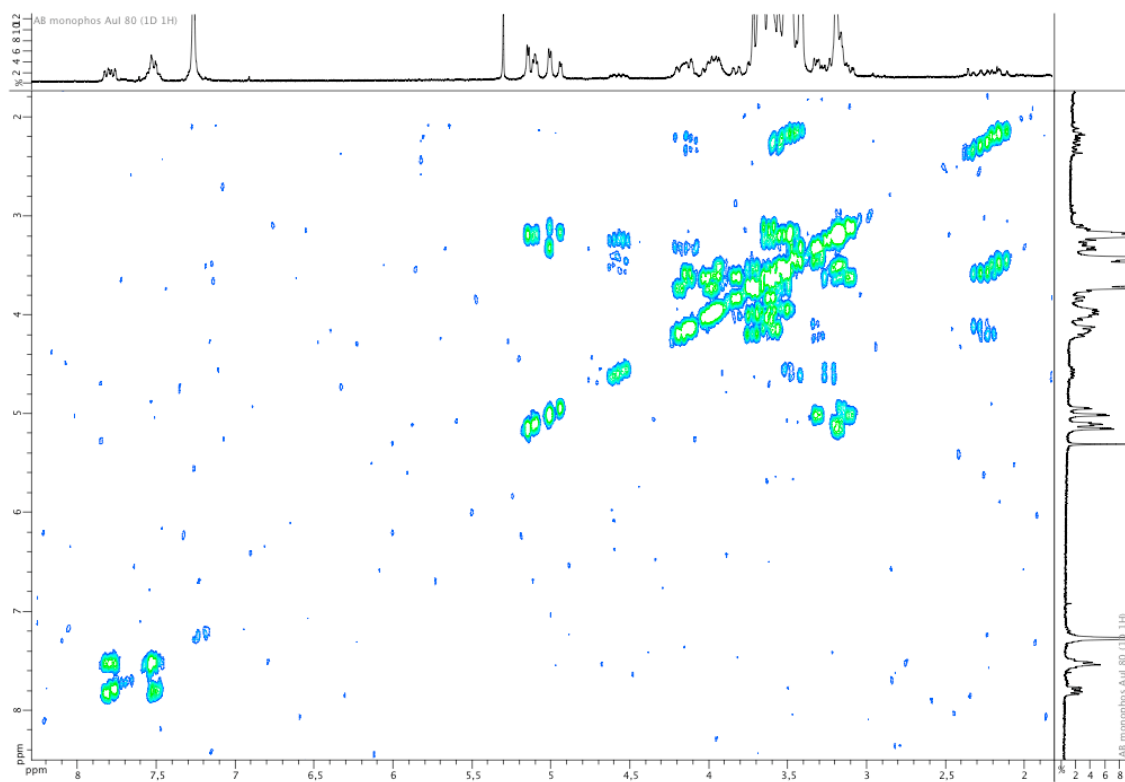

$^1\text{H}$ - $^1\text{H}$  COSY NMR spectrum of **7** recorded in  $\text{CDCl}_3$  at 300.1 MHz.

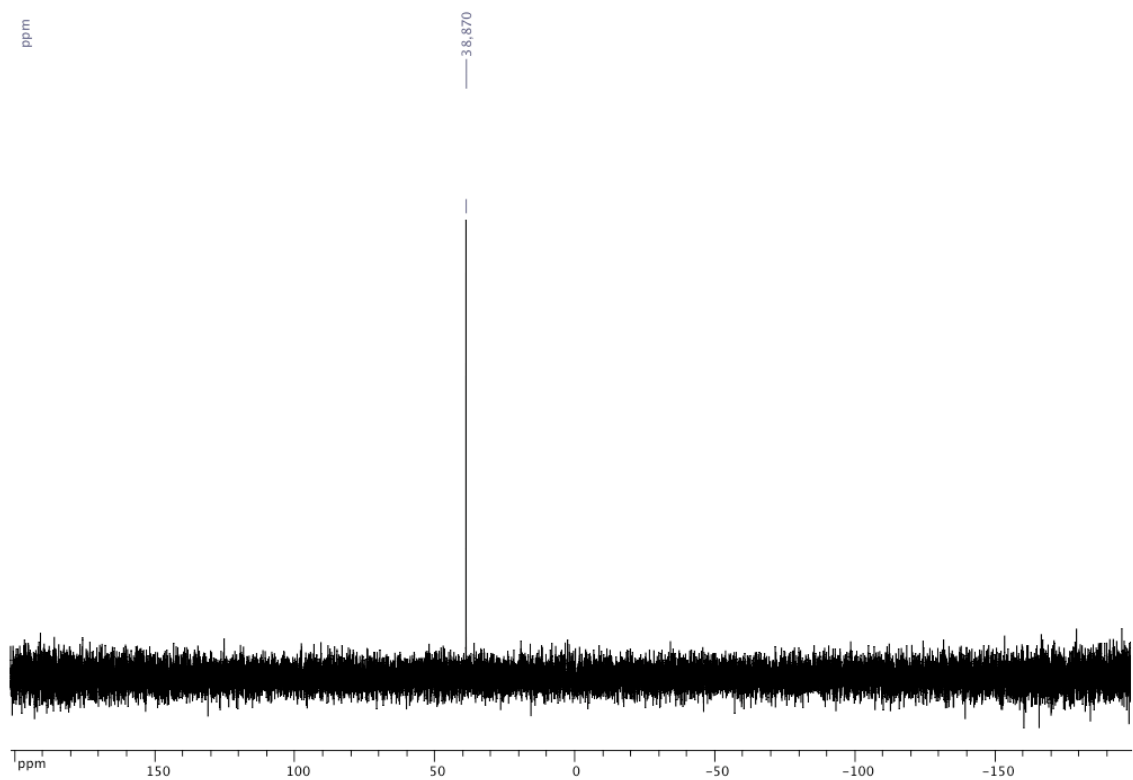

$^{31}\text{P}\{^1\text{H}\}$  NMR spectrum of **7** recorded in  $\text{CDCl}_3$  at 121.5 MHz.

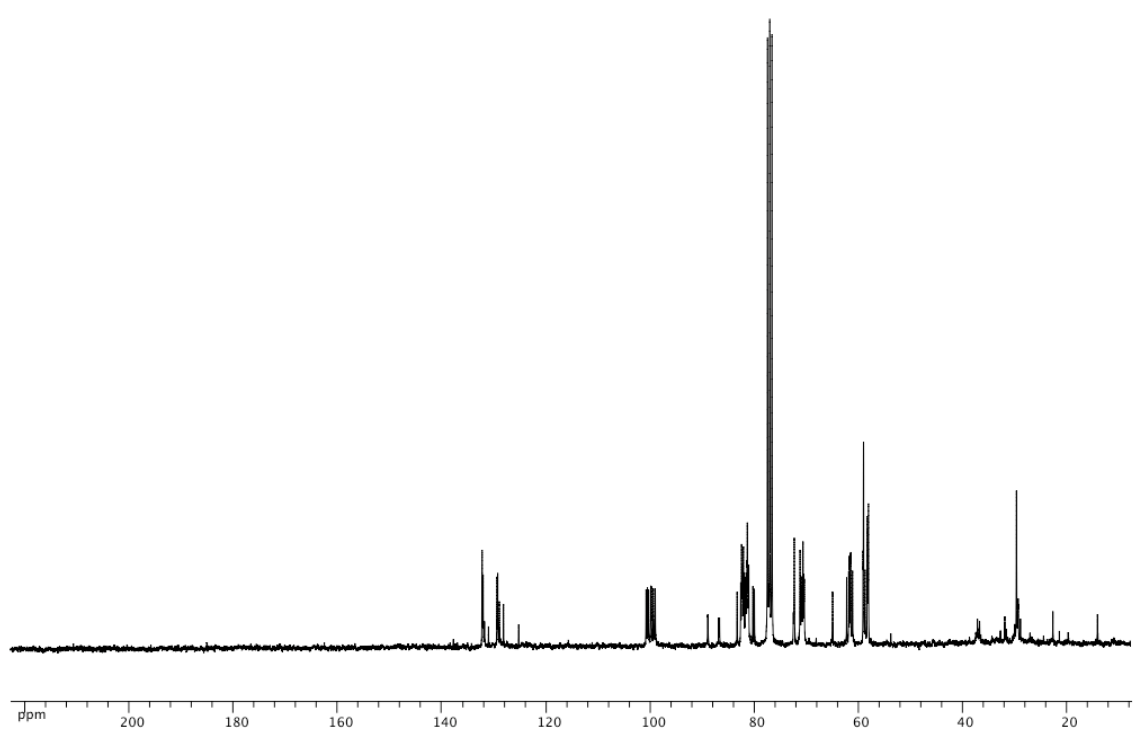

$^{13}\text{C}\{^1\text{H}\}$  NMR spectrum of **7** recorded in  $\text{CDCl}_3$  at 75.5 MHz.

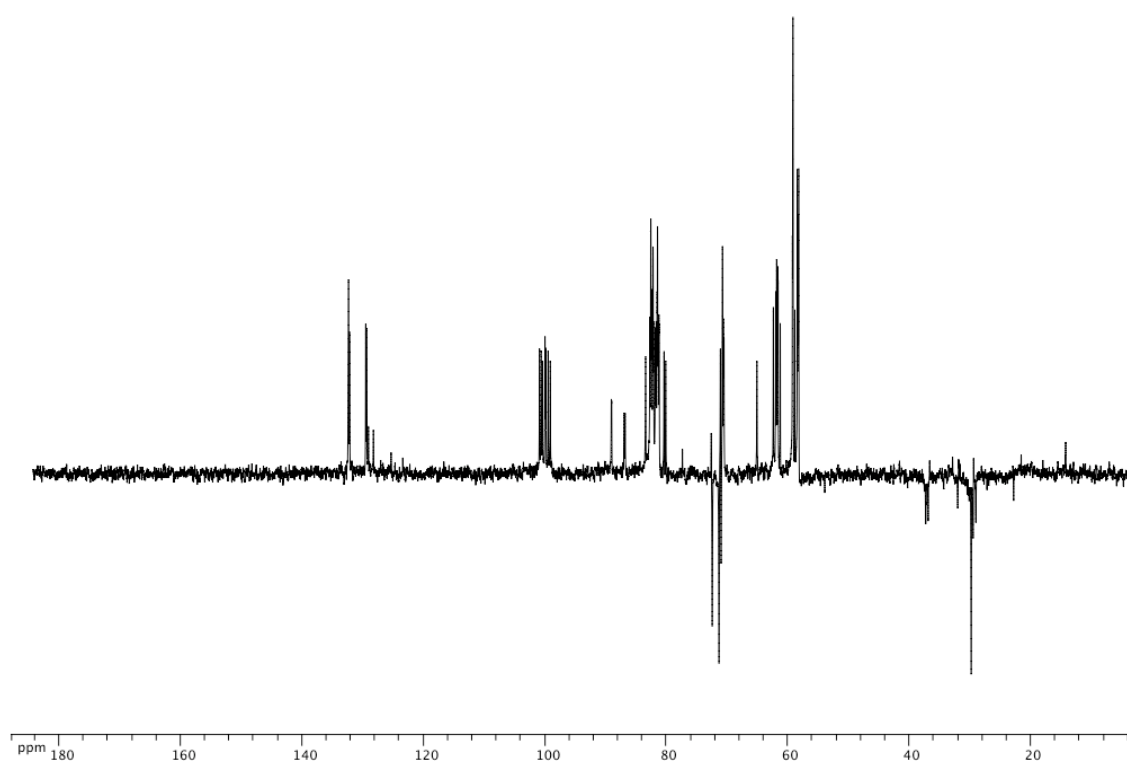

DEPT135 spectrum of **7** recorded in  $\text{CDCl}_3$  at 75.5 MHz.

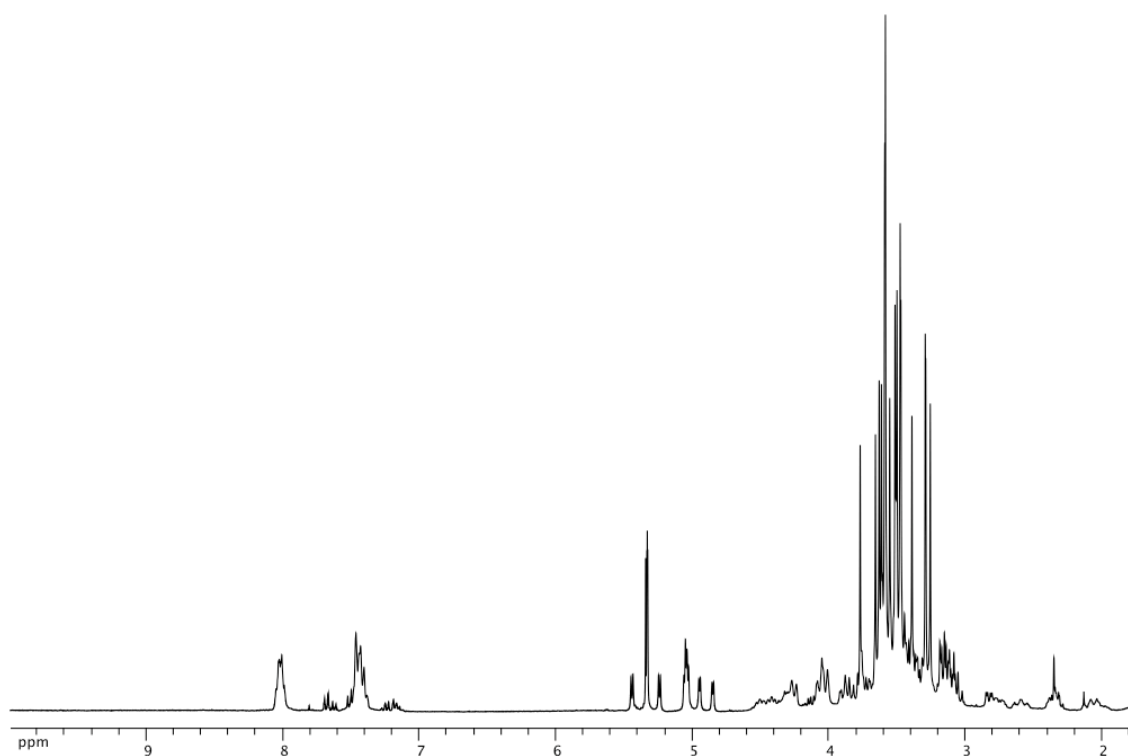

$^1\text{H}$  NMR spectrum of **8** recorded in  $\text{CD}_2\text{Cl}_2$  at 300.1 MHz.

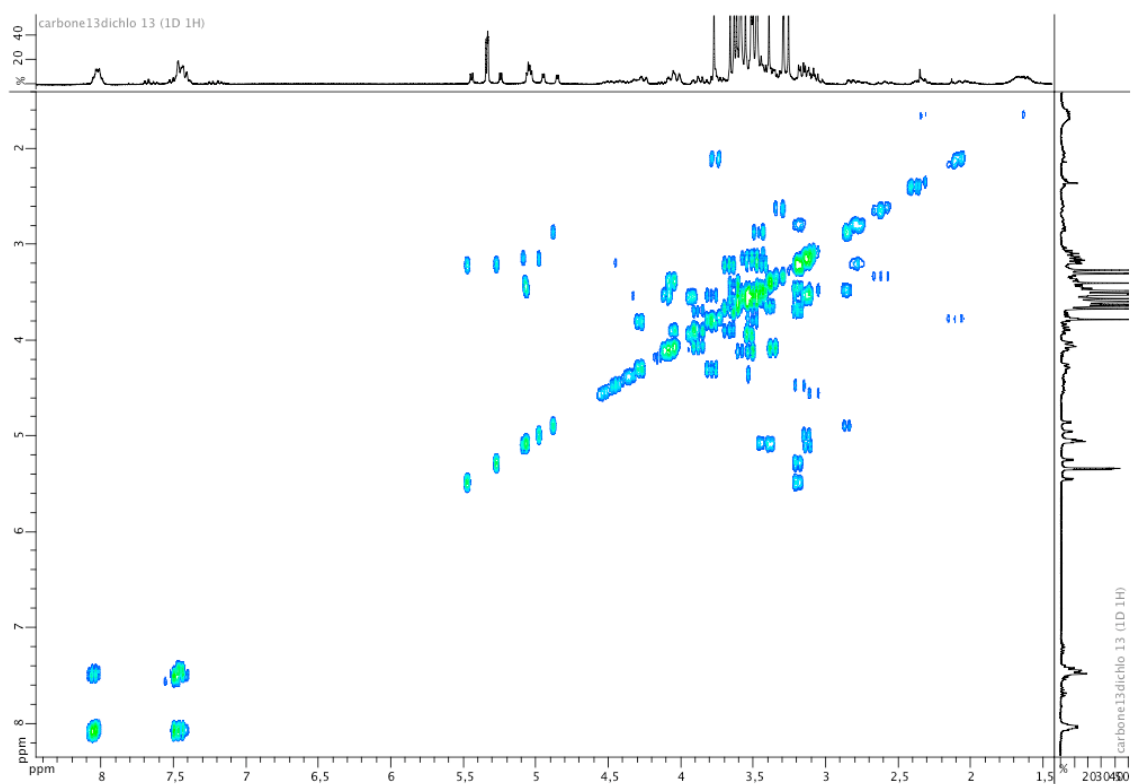

$^1\text{H}$ - $^1\text{H}$  COSY NMR spectrum of **8** recorded in  $\text{CDCl}_3$  at 300.1 MHz.



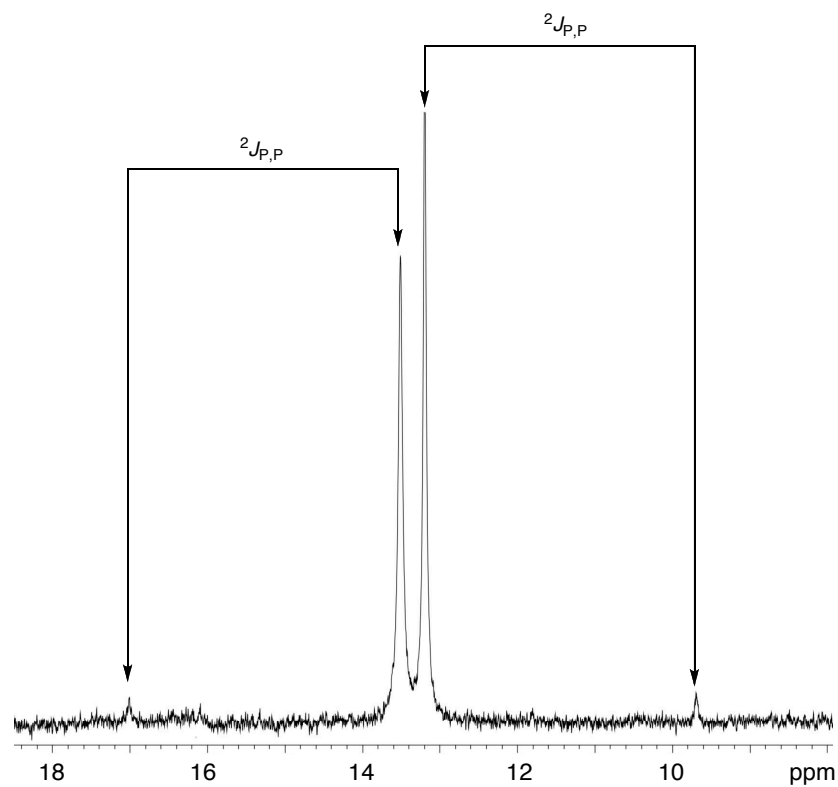

$^{31}\text{P}\{^1\text{H}\}$  NMR spectrum of **8** recorded in  $\text{C}_2\text{D}_2\text{Cl}_4$  at 162.0 MHz.

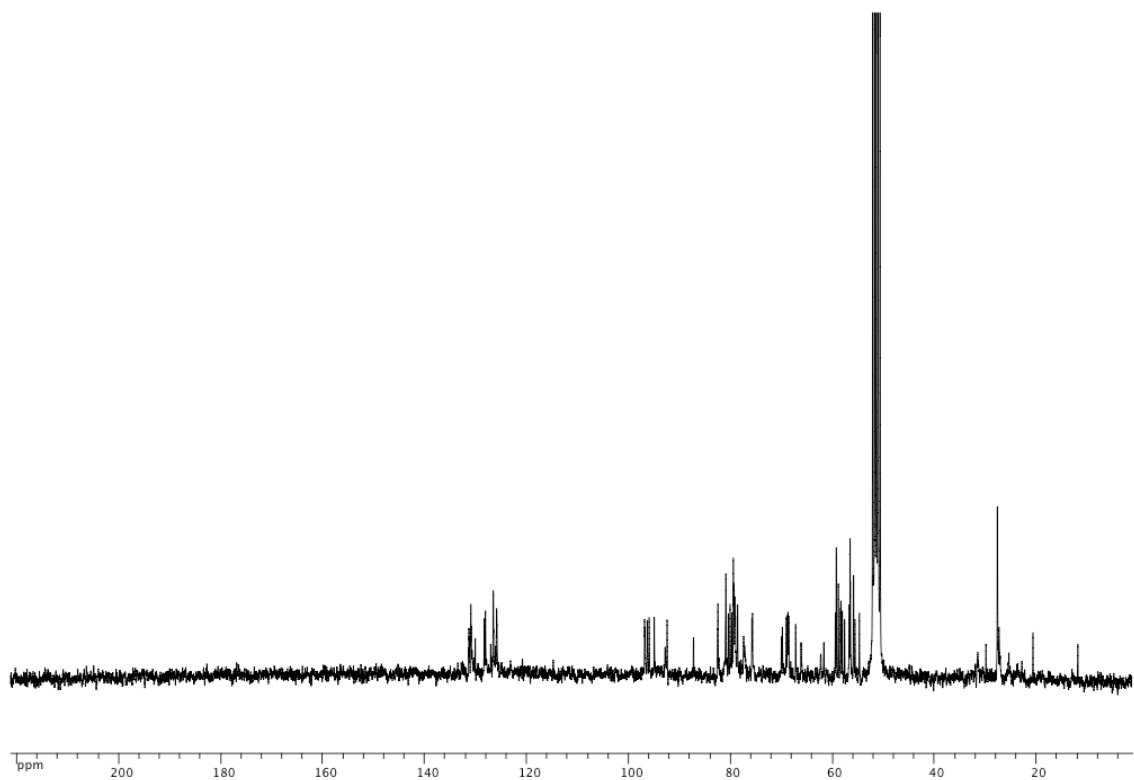

$^{13}\text{C}\{^1\text{H}\}$  NMR spectrum of **8** recorded in  $\text{CD}_2\text{Cl}_2$  at 75.5 MHz.

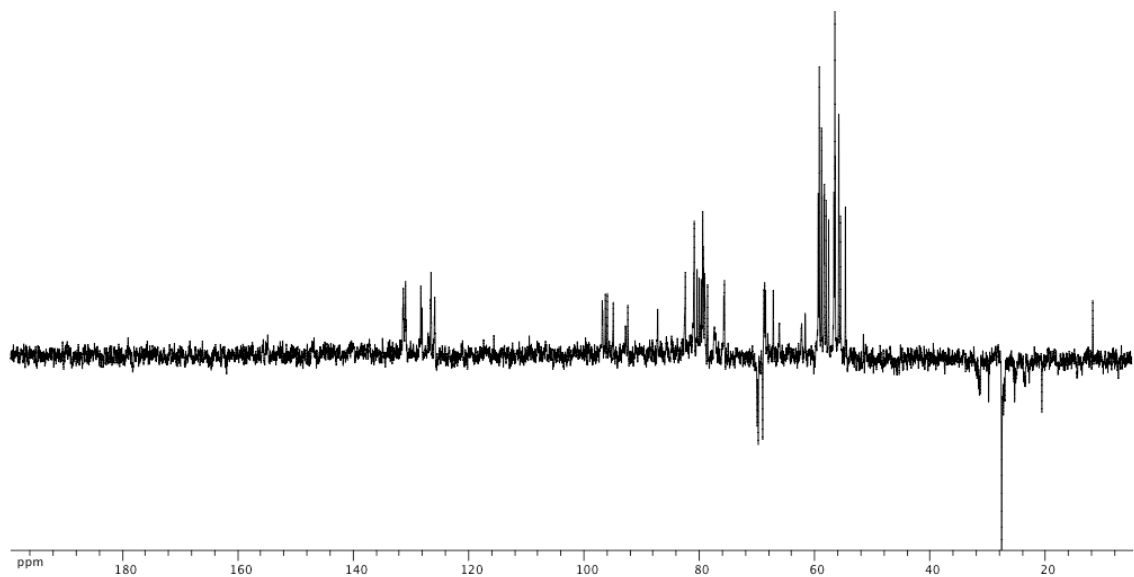

DEPT135 spectrum of **8** recorded in CD<sub>2</sub>Cl<sub>2</sub> at 75.5 MHz.

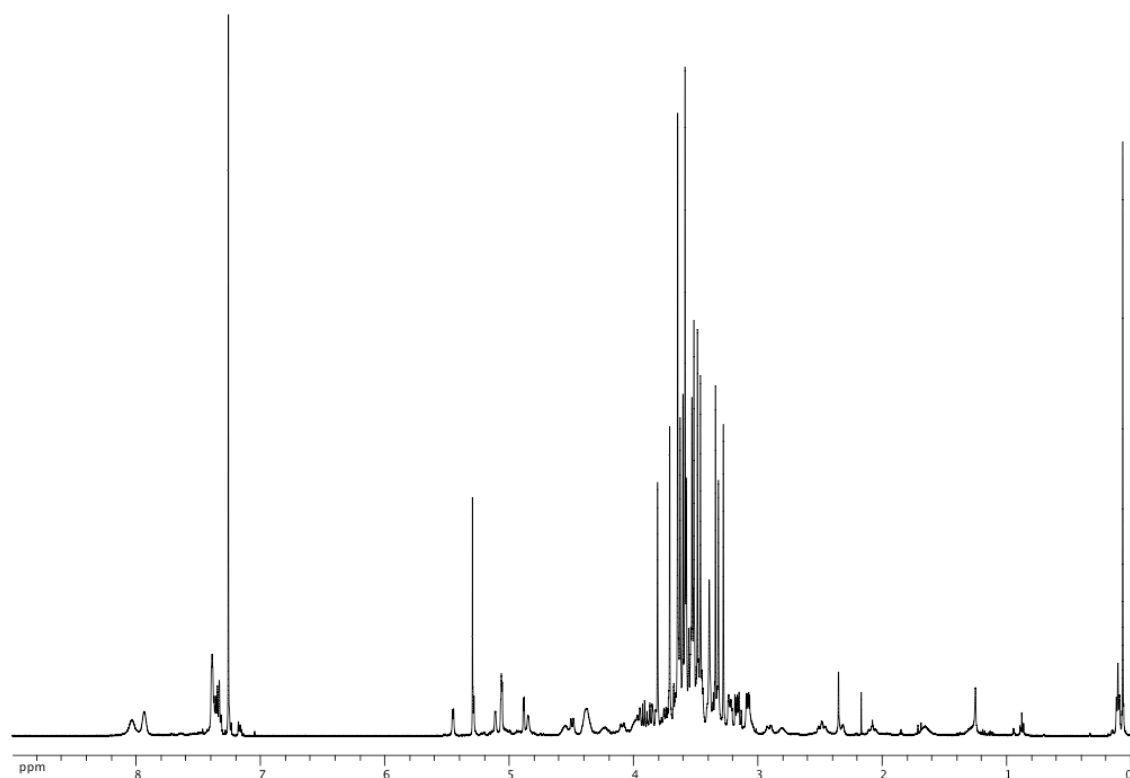

$^1\text{H}$  NMR spectrum of **9** recorded in  $\text{CDCl}_3$  at 500.1 MHz.

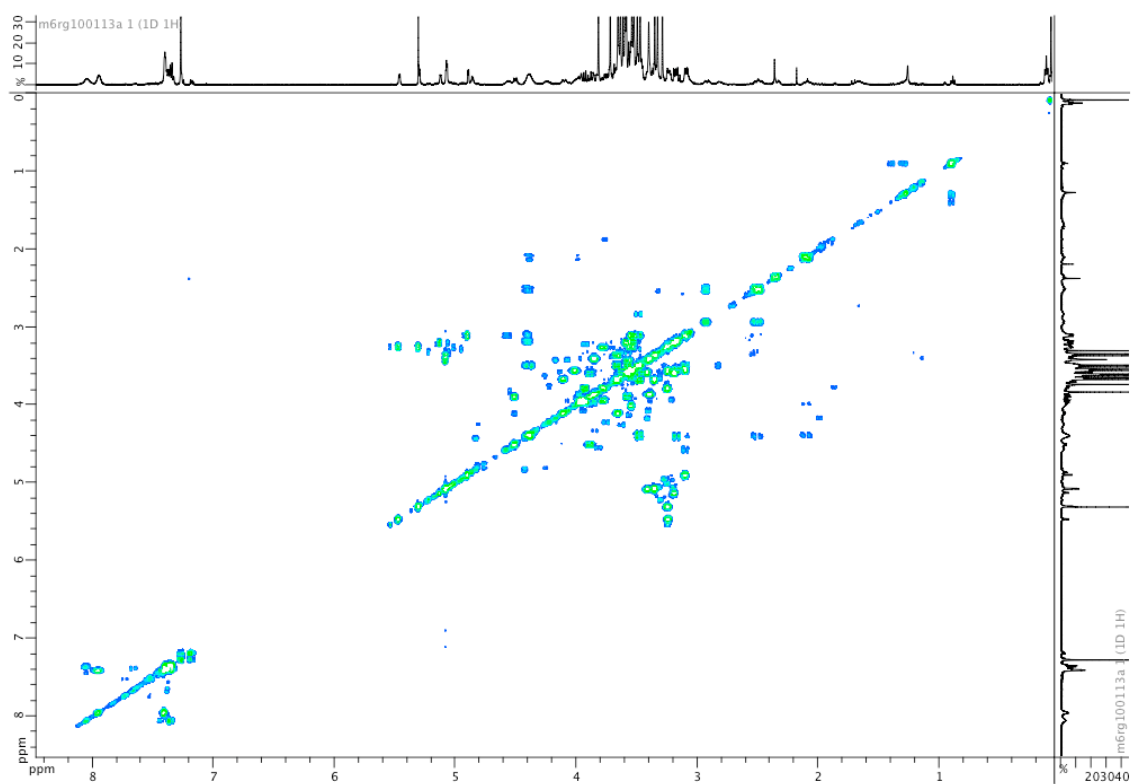

$^1\text{H}$ - $^1\text{H}$  COSY NMR spectrum of **9** recorded in  $\text{CDCl}_3$  at 500.1 MHz.

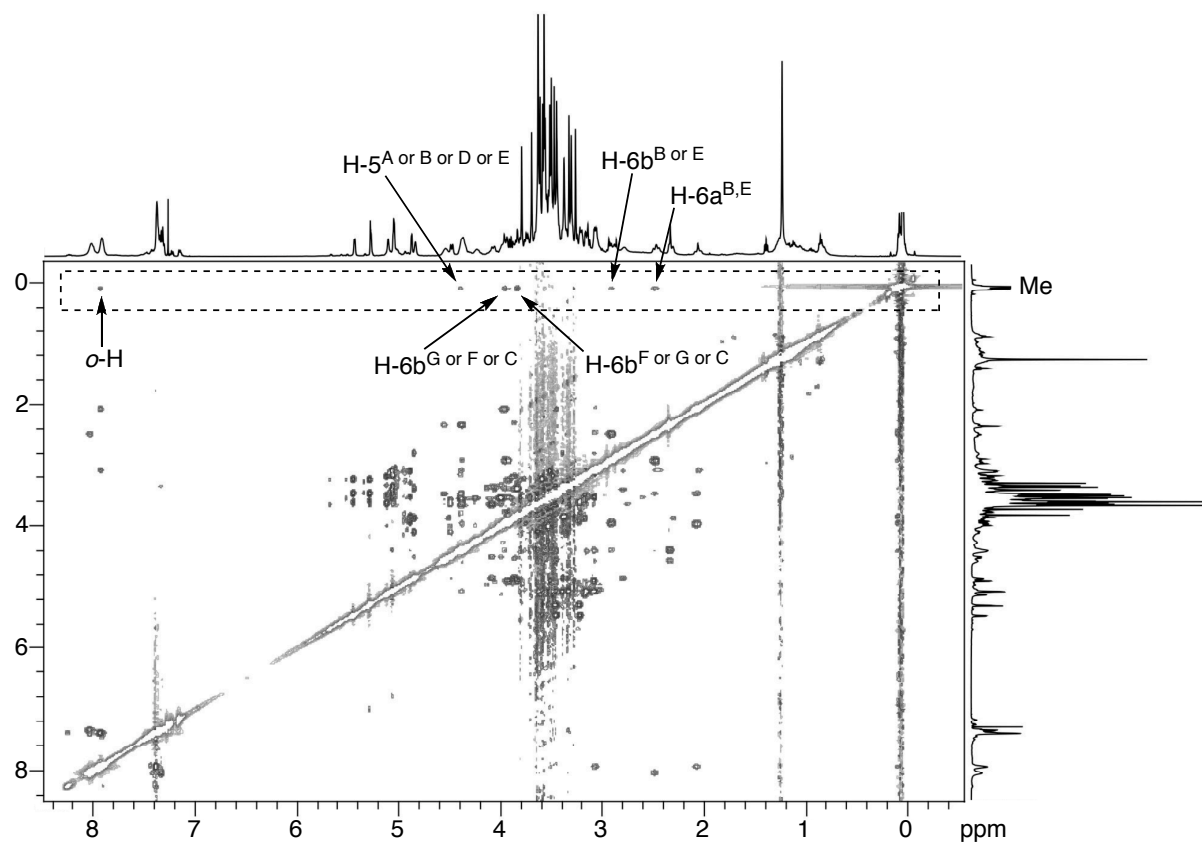

$^1\text{H}$ - $^1\text{H}$  ROESY NMR spectrum of **9** recorded in  $\text{CDCl}_3$  at 500.1 MHz.

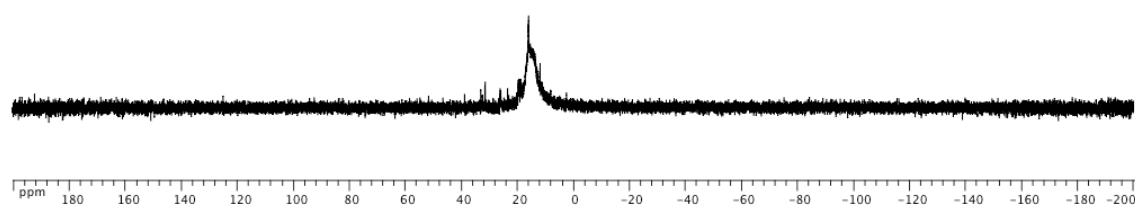

$^{31}\text{P}\{^1\text{H}\}$  NMR spectrum of **9** recorded in  $\text{CDCl}_3$  at 121.5 MHz (298 K).

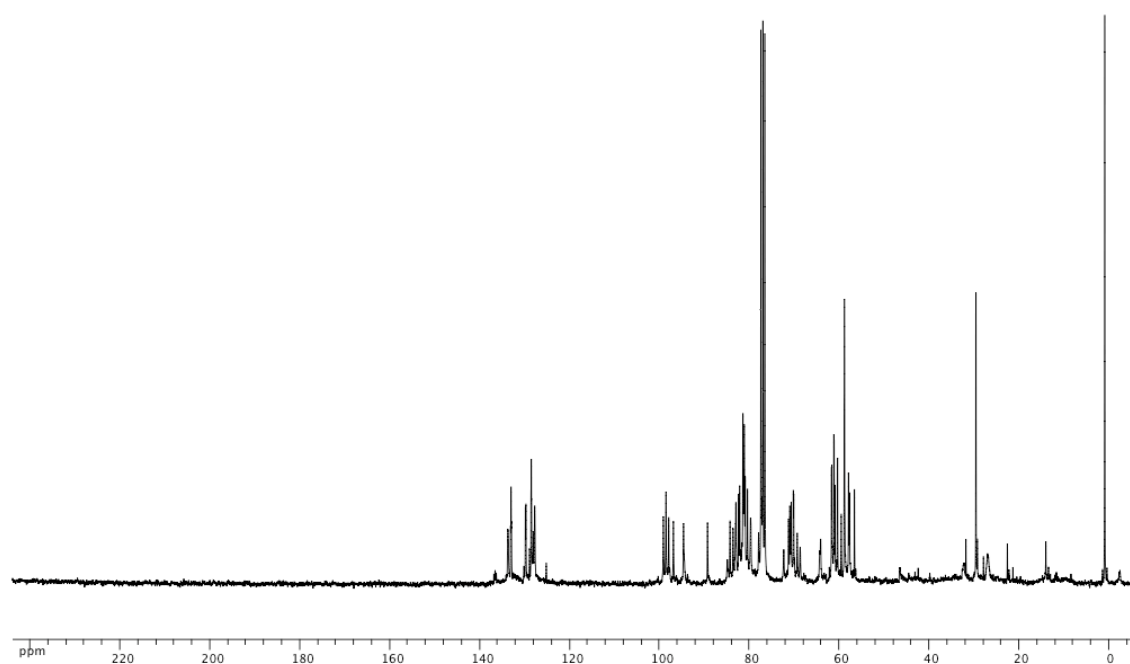

$^{13}\text{C}\{^1\text{H}\}$  NMR spectrum of **9** recorded in  $\text{CDCl}_3$  at 75.5 MHz.



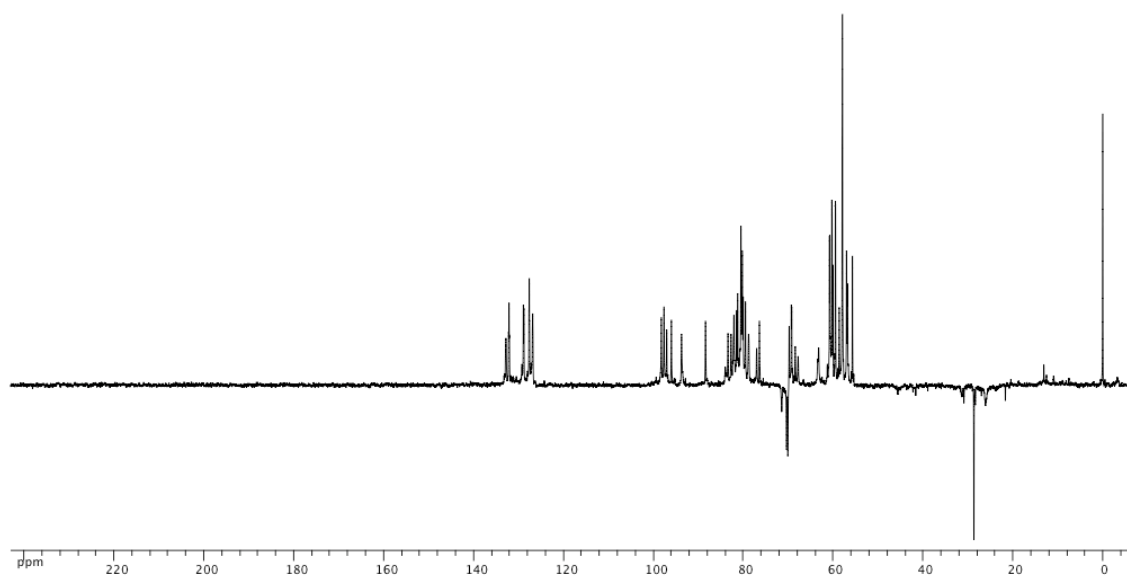

DEPT135 spectrum of **9** recorded in CDCl<sub>3</sub> at 75.5 MHz.

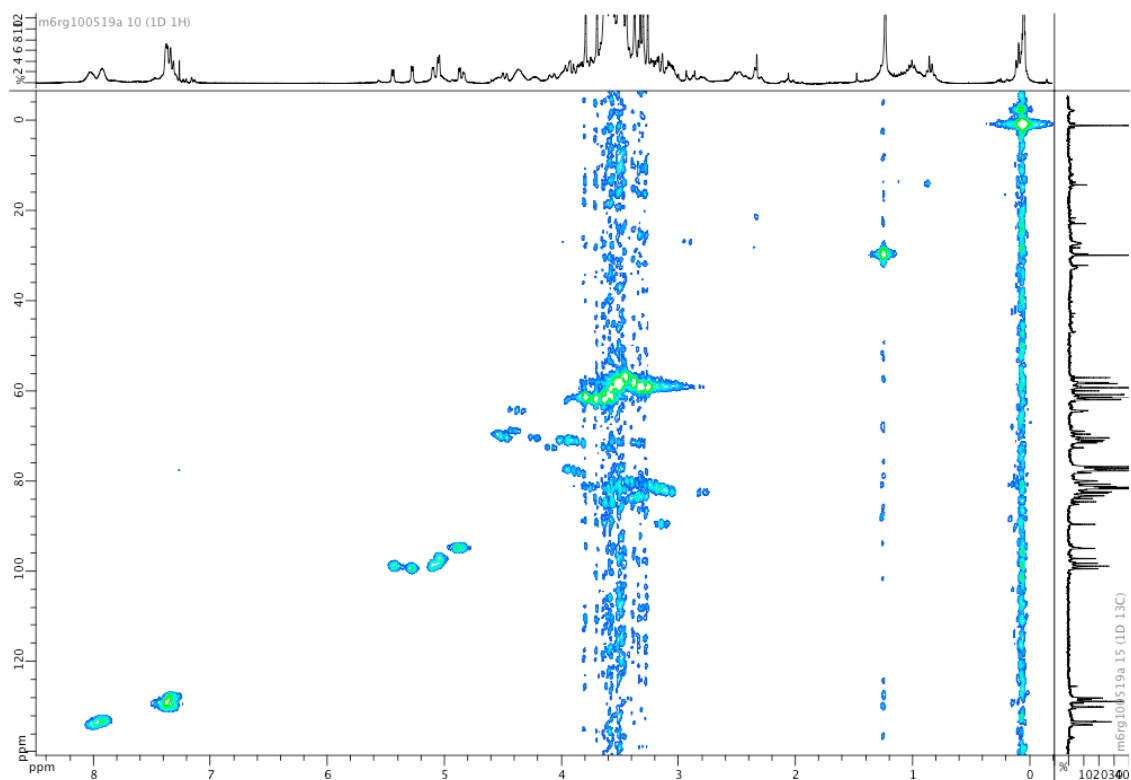

$^1\text{H}$ - $^{13}\text{C}\{^1\text{H}\}$  HMQC spectrum of **9** recorded in  $\text{CDCl}_3$  at 300.1 MHz.

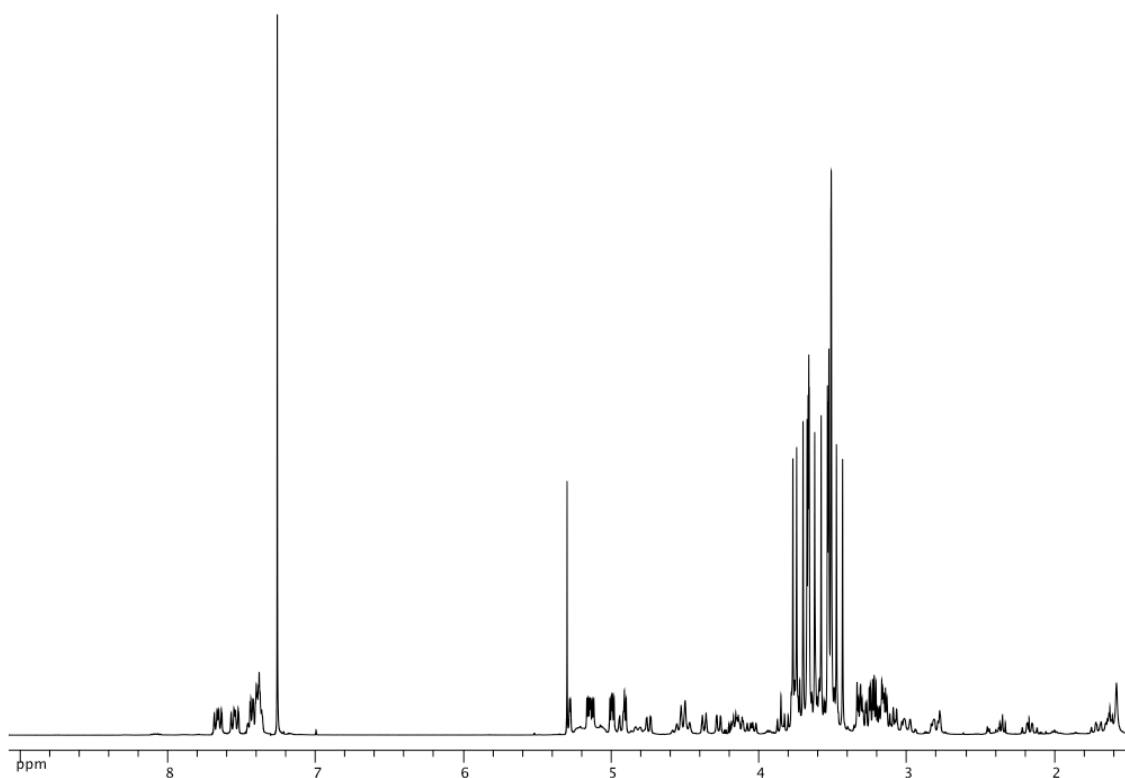

$^1\text{H}$  NMR spectrum of **10** recorded in  $\text{CDCl}_3$  at 400.1 MHz.

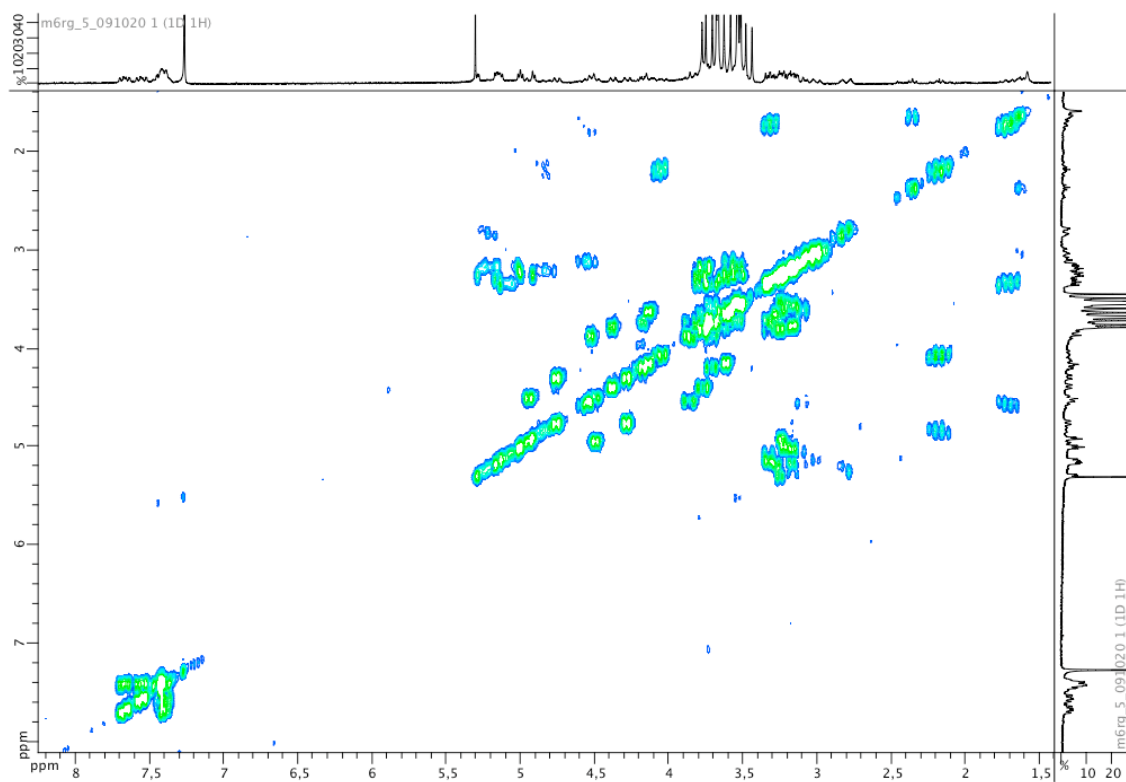

$^1\text{H}$ - $^1\text{H}$  COSY NMR spectrum of **10** recorded in  $\text{CDCl}_3$  at 400.1 MHz.

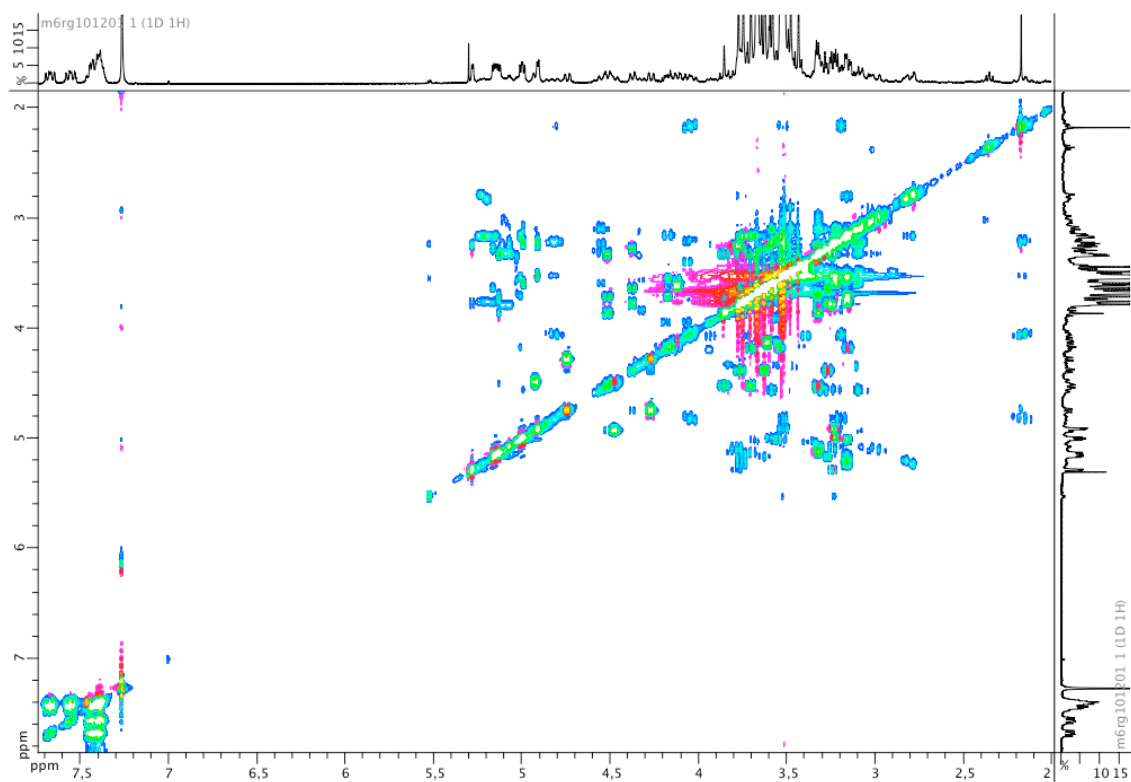

$^1\text{H}$ - $^1\text{H}$  TOCSY NMR spectrum of **10** recorded in  $\text{CDCl}_3$  at 400.1 MHz.

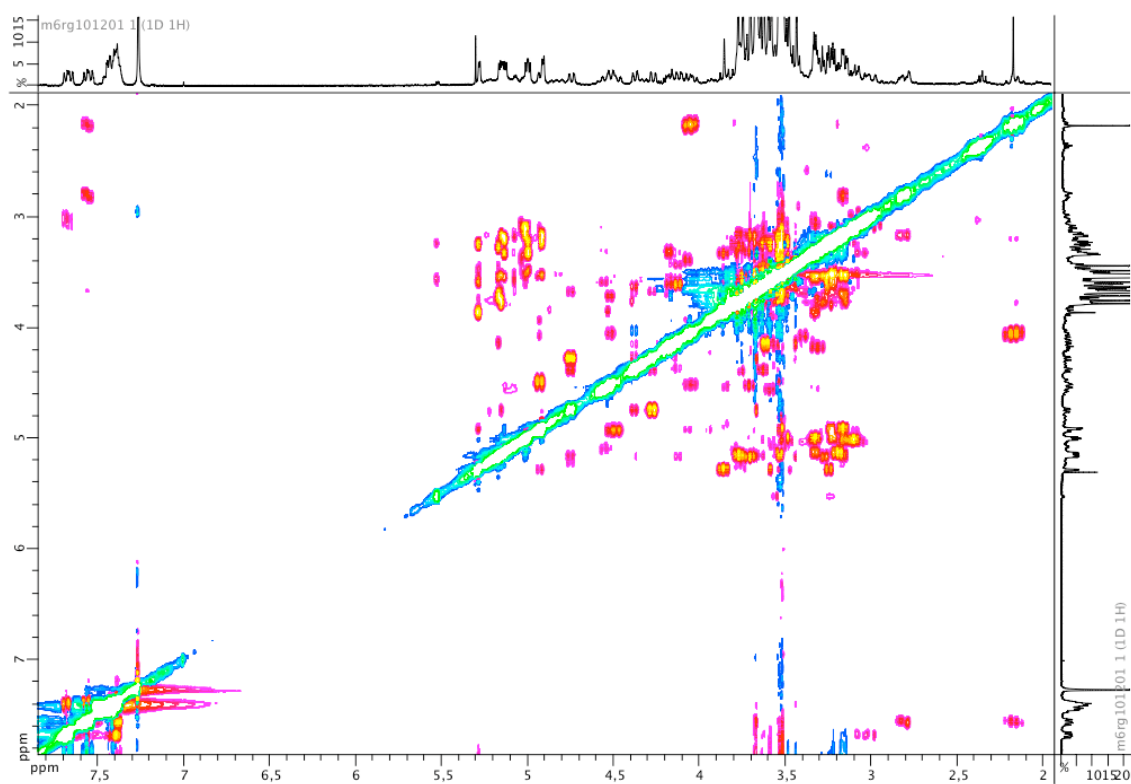

$^1\text{H}$ - $^1\text{H}$  ROESY NMR spectrum of **10** recorded in  $\text{CDCl}_3$  at 400.1 MHz.

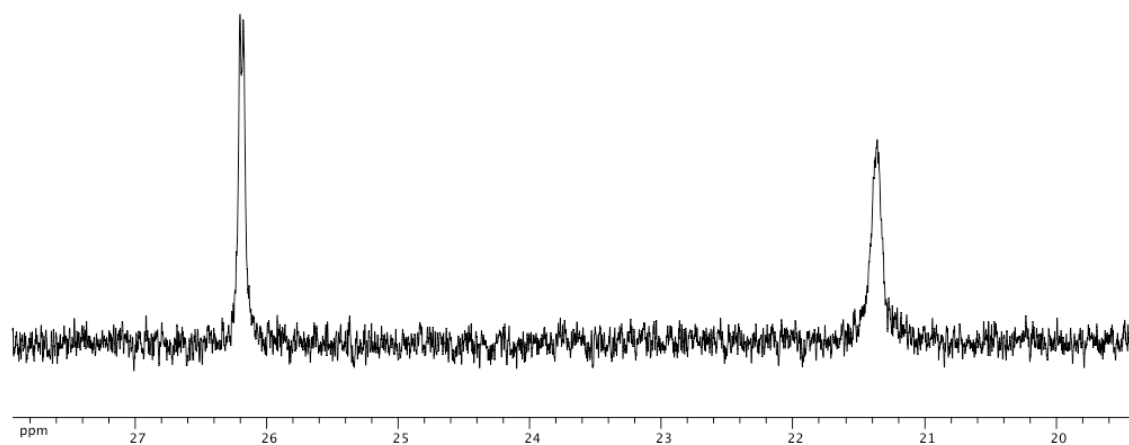

$^{31}\text{P}\{^1\text{H}\}$  NMR spectrum of **10** recorded in  $\text{CDCl}_3$  at 162.0 MHz (298 K).

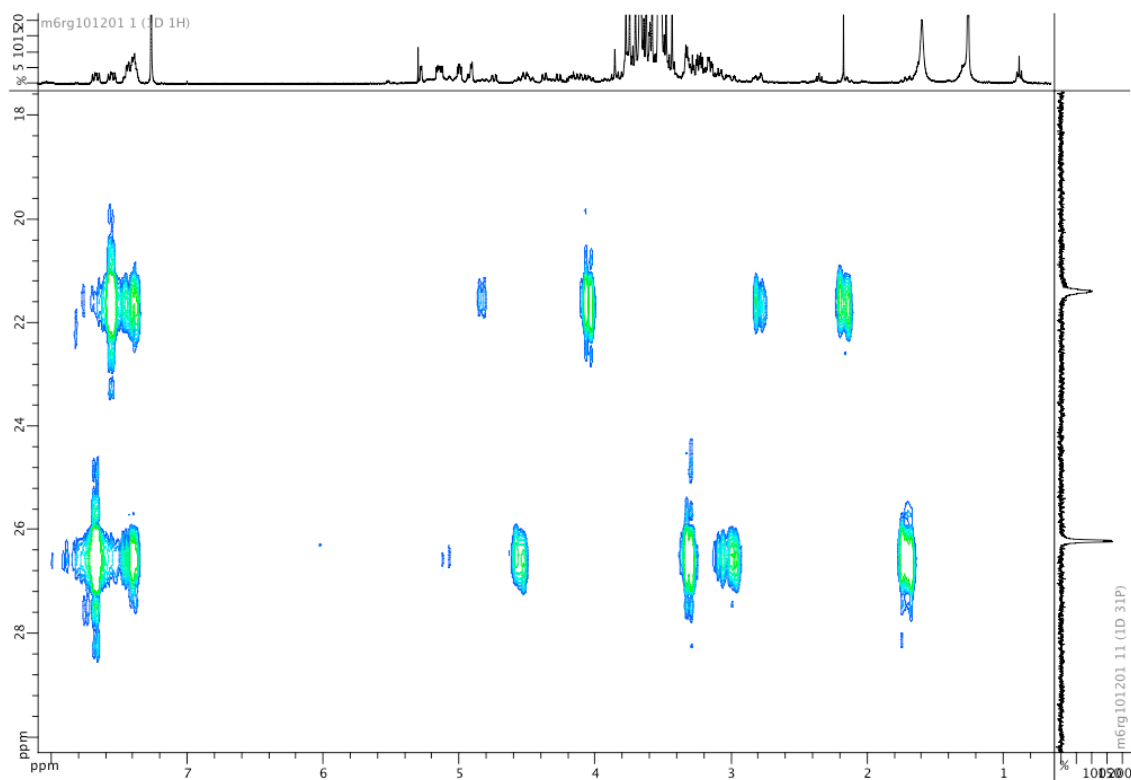

$^1\text{H}$ - $^{31}\text{P}\{^1\text{H}\}$  NMR spectrum of **10** recorded in  $\text{CDCl}_3$  at 400.1 MHz.



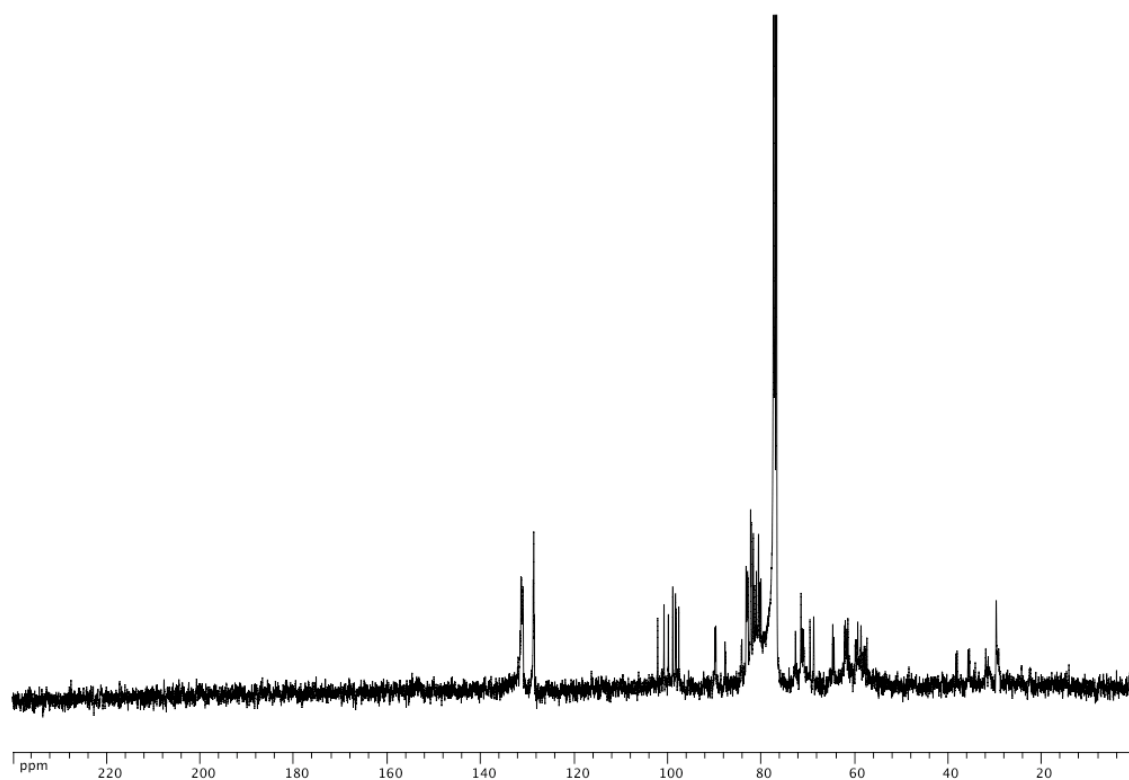

$^{13}\text{C}\{^1\text{H}\}$  NMR spectrum of **10** recorded in  $\text{CDCl}_3$  at 100.6 MHz.

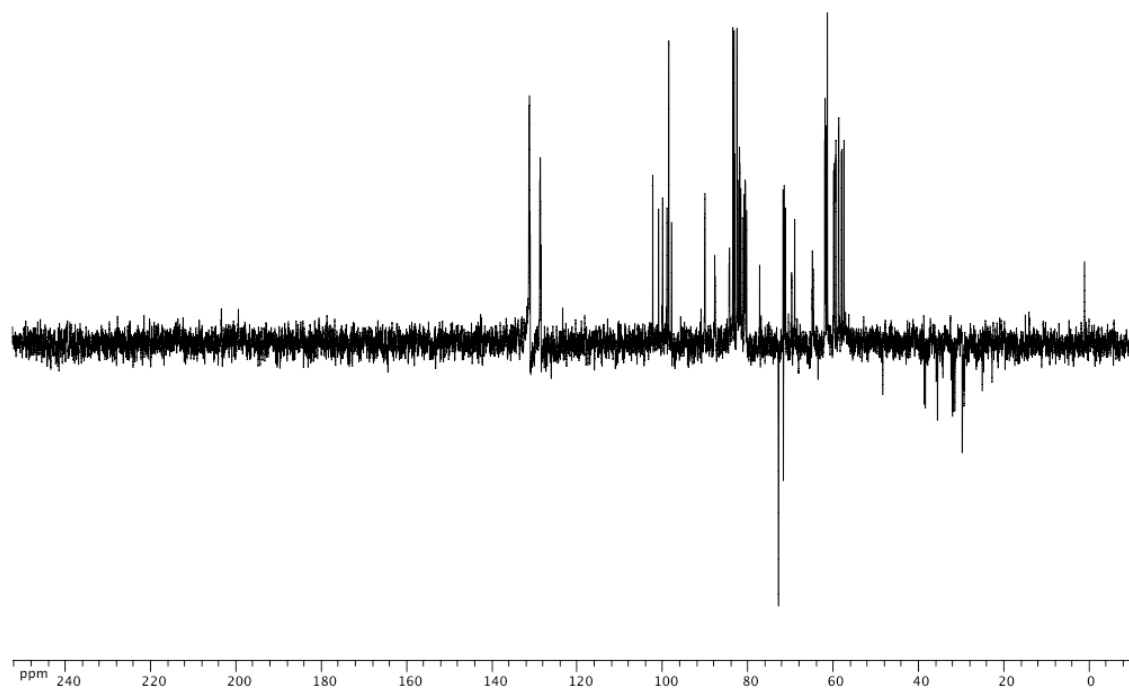

DEPT135 spectrum of **10** recorded in  $\text{CDCl}_3$  at 100.6 MHz.

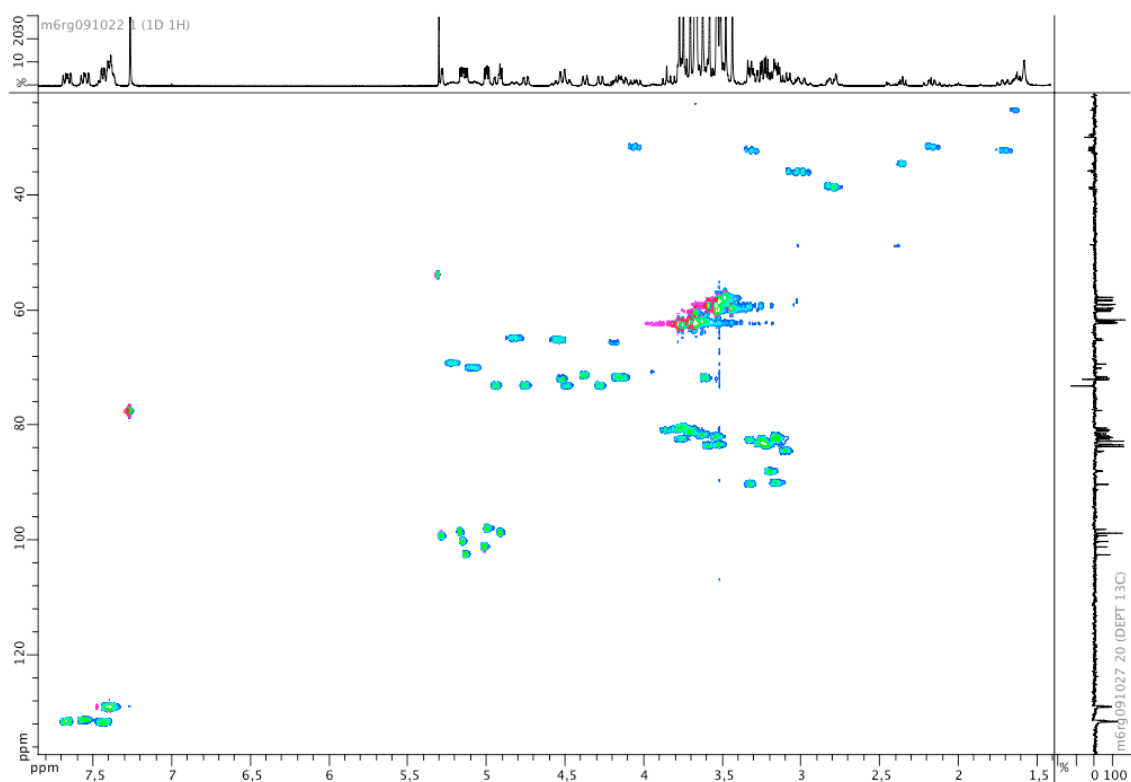

$^1\text{H}$ - $^{13}\text{C}\{^1\text{H}\}$  HMQC spectrum of **10** recorded in  $\text{CDCl}_3$  at 400.1 MHz.

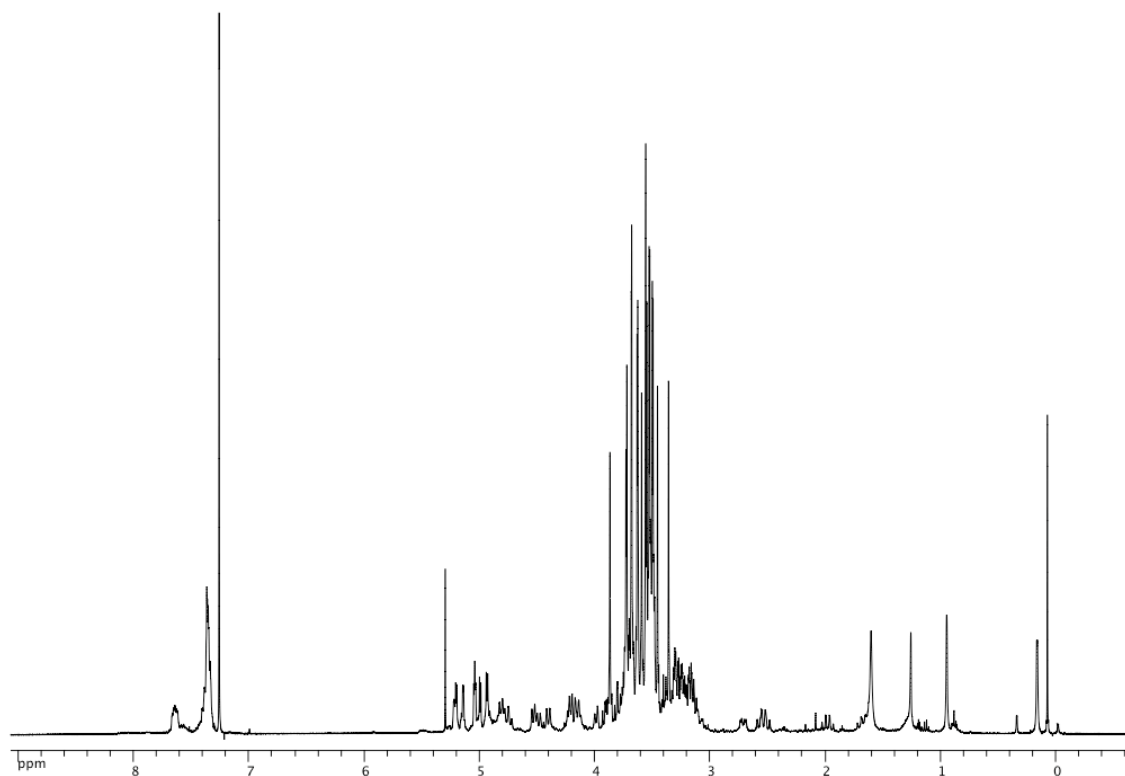

$^1\text{H}$  NMR spectrum of **11** recorded in  $\text{CDCl}_3$  at 400.1 MHz.

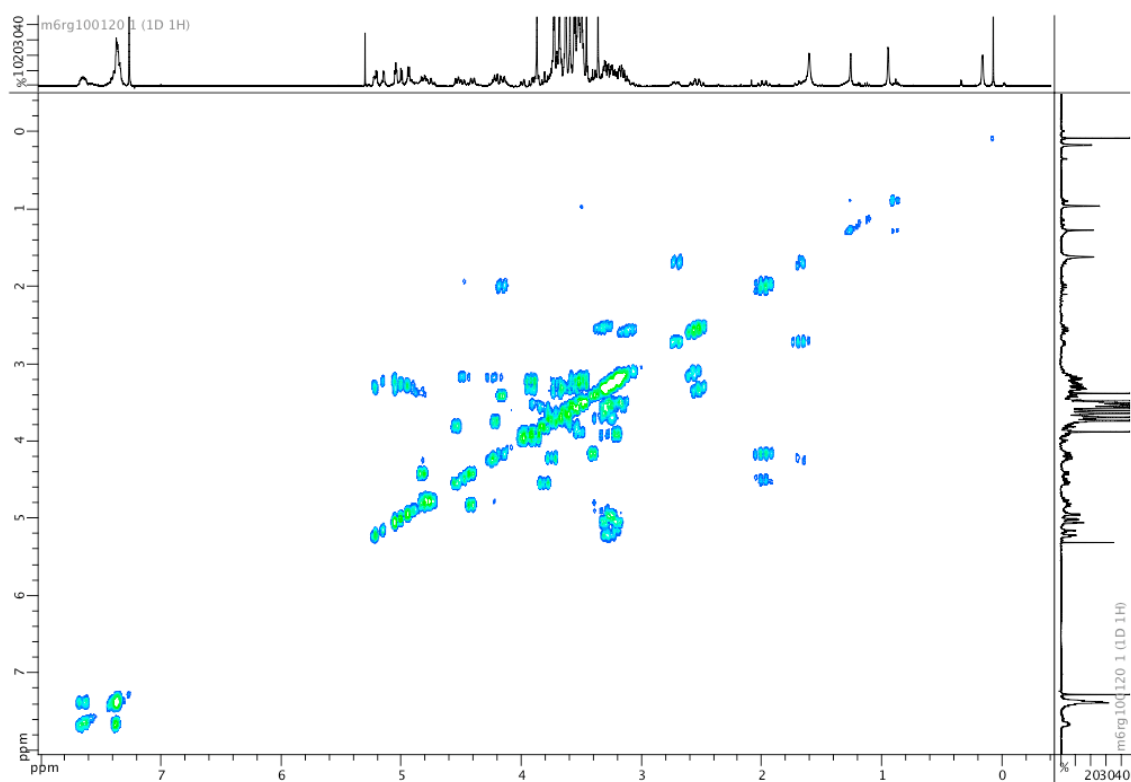

$^1\text{H}$ - $^1\text{H}$  COSY NMR spectrum of **11** recorded in  $\text{CDCl}_3$  at 400.1 MHz.

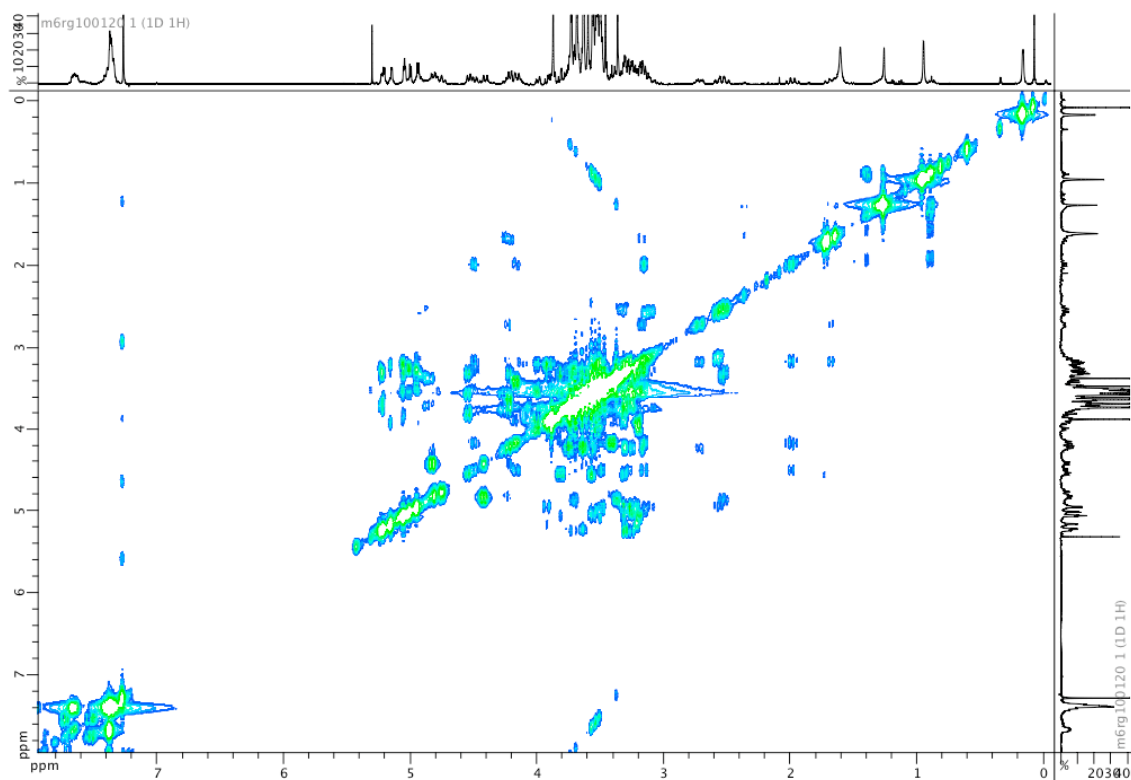

$^1\text{H}$ - $^1\text{H}$  TOCSY NMR spectrum of **11** recorded in  $\text{CDCl}_3$  at 400.1 MHz.

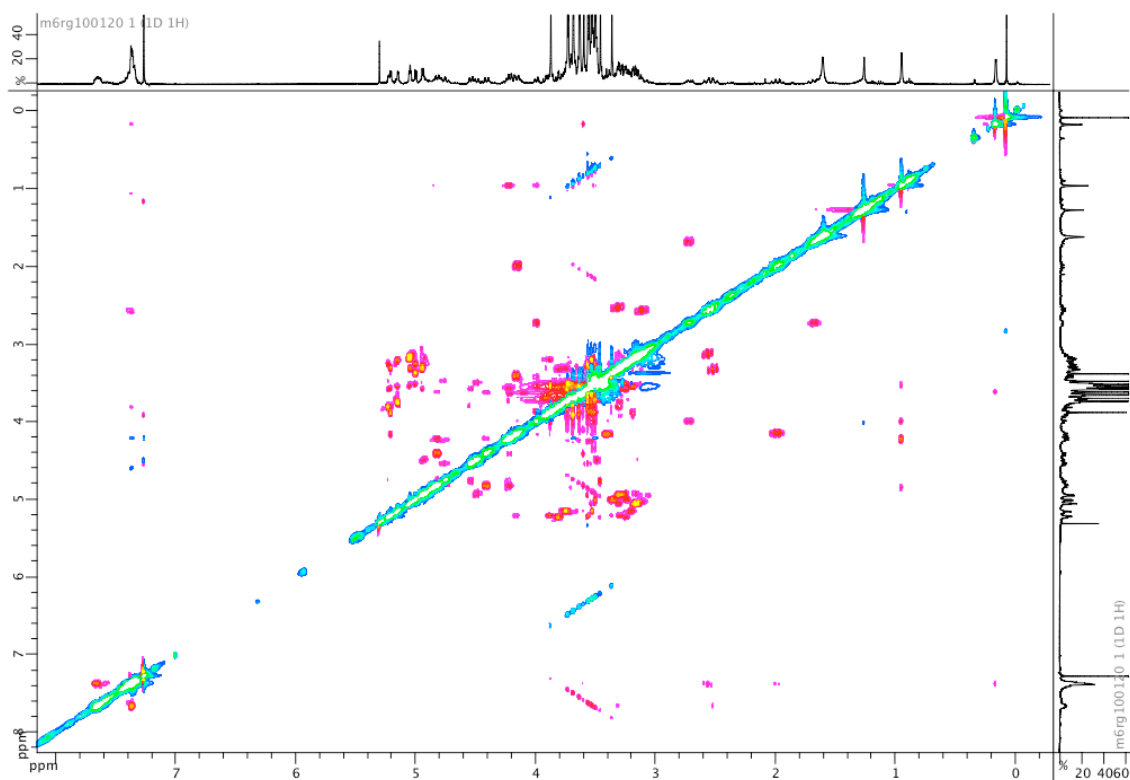

$^1\text{H}$ - $^1\text{H}$  ROESY NMR spectrum of **11** recorded in  $\text{CDCl}_3$  at 400.1 MHz.

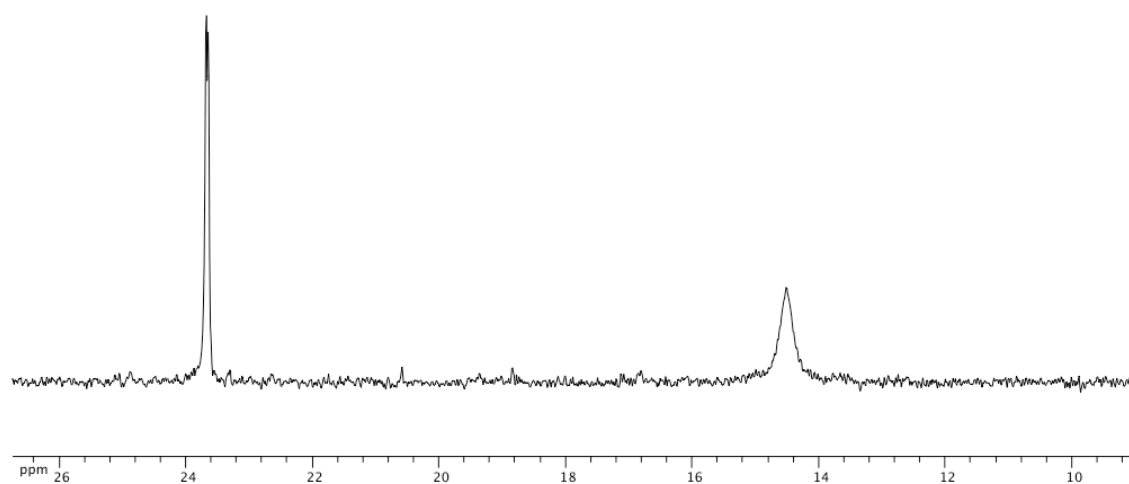

$^{31}\text{P}\{^1\text{H}\}$  NMR spectrum of **11** recorded in  $\text{CDCl}_3$  at 162.0 MHz (298 K).



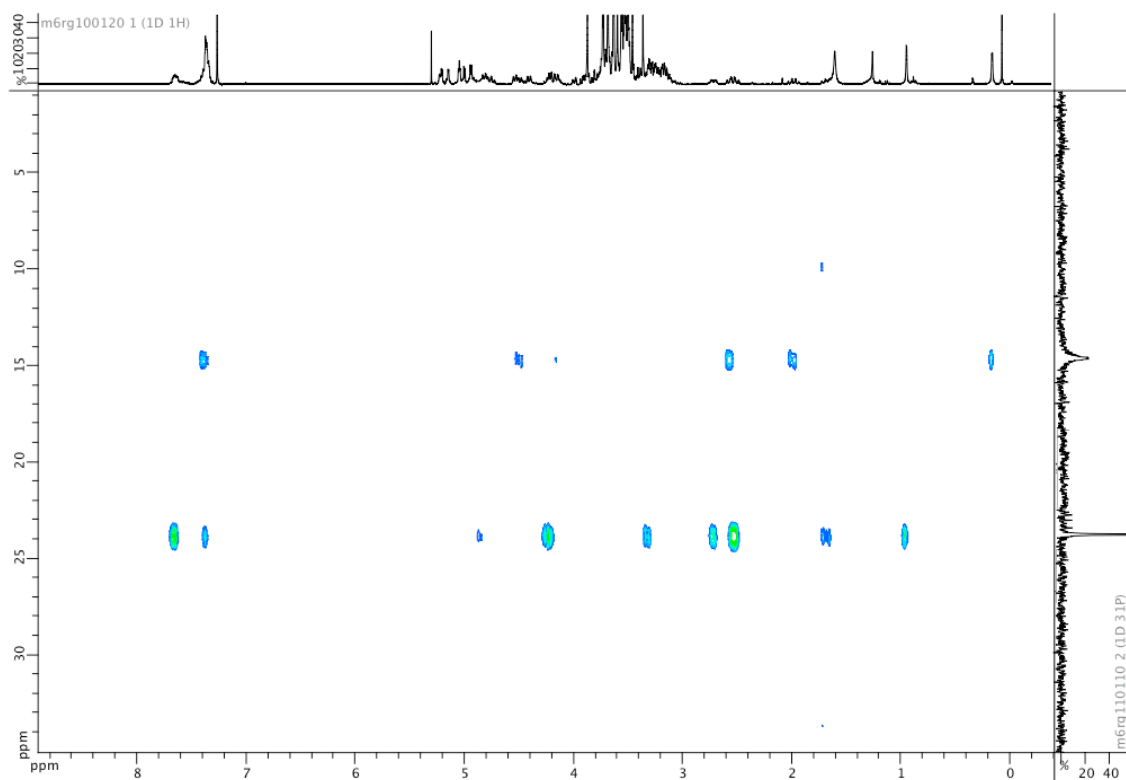

$^1\text{H}$ - $^{31}\text{P}\{^1\text{H}\}$  NMR spectrum of **11** recorded in  $\text{CDCl}_3$  at 400.1 MHz.

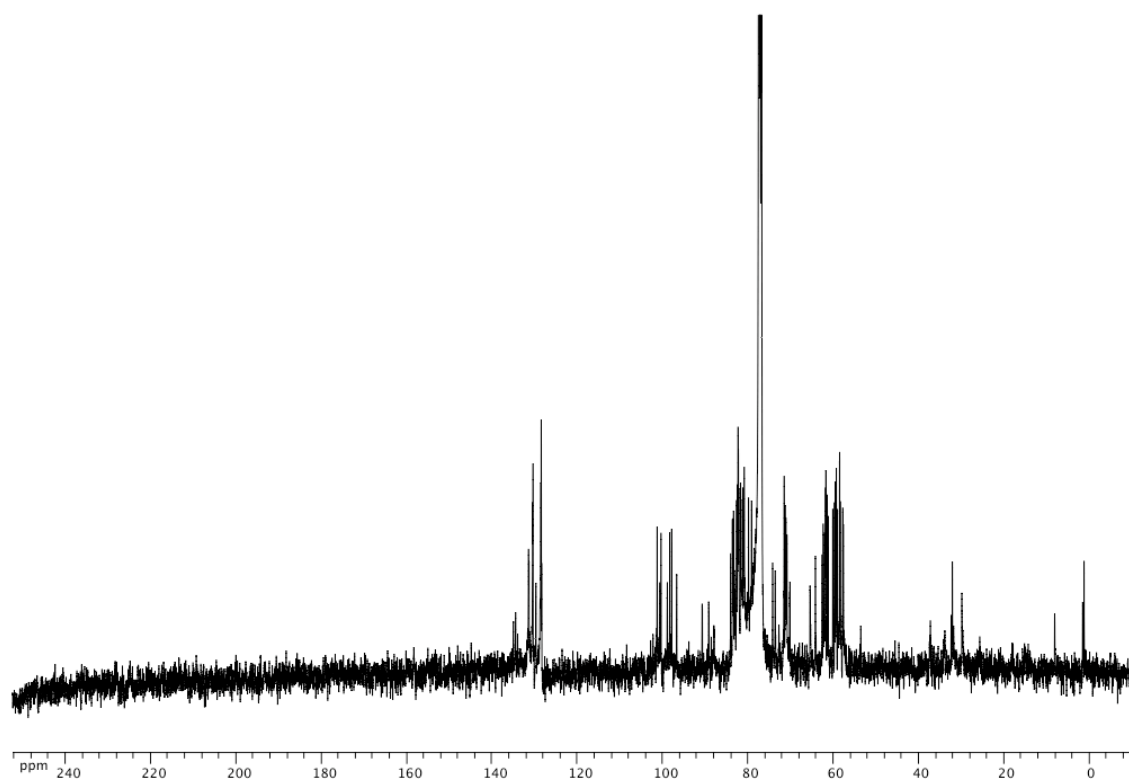

$^{13}\text{C}\{^1\text{H}\}$  NMR spectrum of **11** recorded in  $\text{CDCl}_3$  at 100.6 MHz.

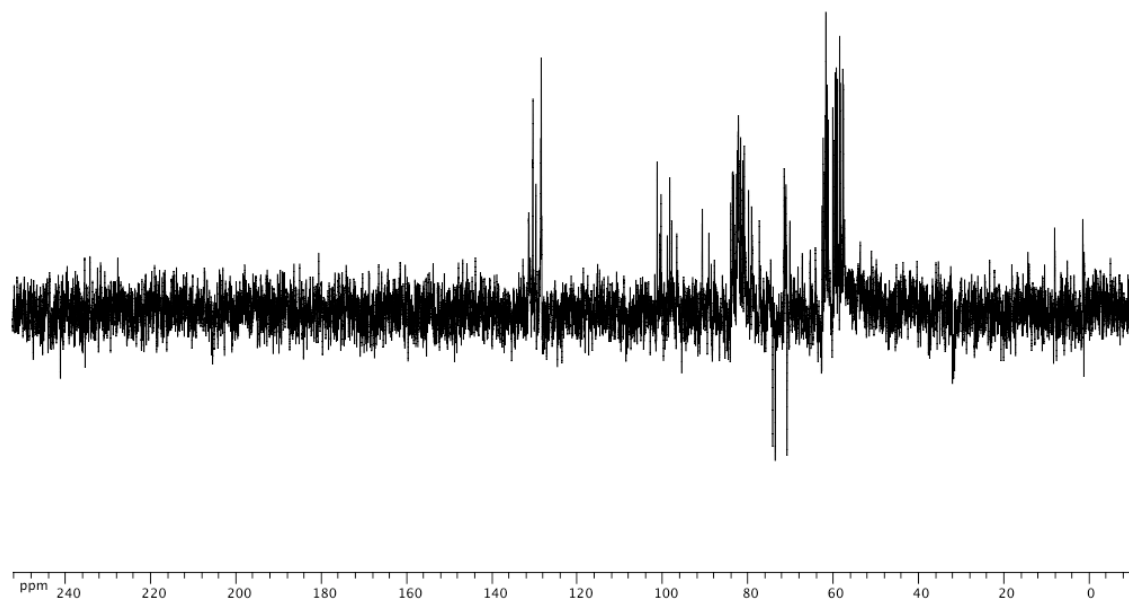

DEPT135 spectrum of **11** recorded in  $\text{CDCl}_3$  at 100.6 MHz.

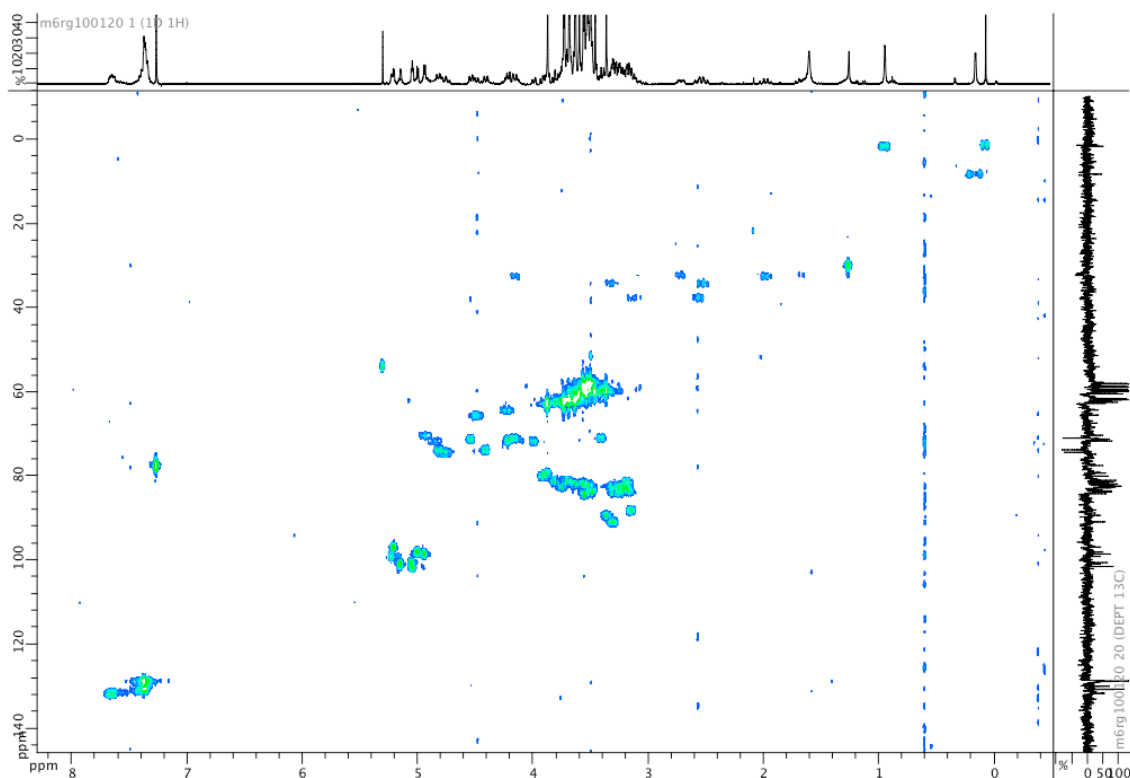

$^1\text{H}$ - $^{13}\text{C}\{^1\text{H}\}$  HMQC spectrum of **11** recorded in  $\text{CDCl}_3$  at 400.1 MHz.

### General procedure for full assignment of the $^1\text{H}$ NMR signals of the glucose units.

The strategy applied for full structural assignment began with the differentiation between capped and non-capped C-6 carbon atoms by DEPT 135. These appear as two distinct sets of signals. The H-6 protons could then be identified using  $^1\text{H}$ - $^{13}\text{C}$  HMQC (Heteronuclear Multiple Quantum Coherence spectroscopy). By using TOCSY (Total Correlation Spectroscopy) and COSY (CORrelated Spectroscopy), each H-6 proton was correlated to the set of protons belonging to the same glucose residue. The connectivity between individual glucose units was then established via a ROESY (Rotating frame Overhauser Effect Spectroscopy) experiment showing the proximity between H-4<sub>N</sub> and H-1<sub>N+1</sub> protons (N and N+1 standing for neighbouring glucose moieties labeled in the alphabetical order).
